# Supplementary material for: Detailed kinetic model for hexyl sulfide pyrolysis and its desulfurization by supercritical water
Source: Royal Society of Chemistry journal article supplement (doi:10.1039/c9cp00234k), 2019-01-01
Supplement: c9cp00234k5.pdf [file c9cp00234k5.pdf]

*Supplementary Information for:*

# Detailed kinetic model for hexyl sulfide pyrolysis and its desulfurization by supercritical water

---

Caleb A. Class <sup>a,b</sup>, AnGayle K. Vasiliou <sup>a,c</sup>, Yuko Kida <sup>a,d</sup>, Michael T. Timko <sup>a,e</sup>, William H. Green <sup>a,f</sup>

|      |                                                                              |    |
|------|------------------------------------------------------------------------------|----|
| S1   | Additional Quantum Chemical Calculations.....                                | 1  |
| S1.1 | Hydrogen Migration .....                                                     | 1  |
| S1.2 | Radical Addition to Multiple Bond .....                                      | 3  |
| S1.3 | Calculation of Rate Constants for Reactions with Submerged Transition States | 5  |
| S2   | H <sub>2</sub> O catalysis of tautomerization reactions .....                | 6  |
| S3   | References .....                                                             | 7  |
| S4   | Optimized geometries.....                                                    | 8  |
| S4.1 | Transition State Geometries .....                                            | 41 |

## **S1 Additional Quantum Chemical Calculations**

### **S1.1 Hydrogen Migration**

Four intramolecular hydrogen abstraction (or hydrogen migration) reactions were chosen for this work, based on possible relevance to the hexyl sulfide decomposition mechanism. Due to the stabilization from the neighboring sulfur atom, the most stable product should be the hexyl sulfide alpha-radical produced from hydrogen abstraction of the initial

reactant. However, in a pyrolysis decomposition mechanism other hexyl sulfide radicals—particularly the beta radical—could also be important intermediates in some of the pathways. Thus, rate parameters were calculated for reactions with five- or six-membered cyclic transition states to convert between different hexyl sulfide radicals.

Rate parameters for four hydrogen migration reactions are presented in Table 1, and Figure 1 shows calculated transition state geometries. The ring size of the transition state had the greatest effect on the rate constant, as reactions S2 and S4 had greater Arrhenius pre-factors ( $\ln A$ ) but lower values for  $n$ , as well as activation energies approximately 22 kJ/mol less than the similar reactions (S1 and S3, respectively) with one fewer carbon in the cyclic transition state. Comparing reactions with the same number of atoms in the transition state ring, we see that the reaction rates at 400 °C will be similar (within a factor of 10) for reactions S1 and S3, and likewise for reactions S2 and S4.

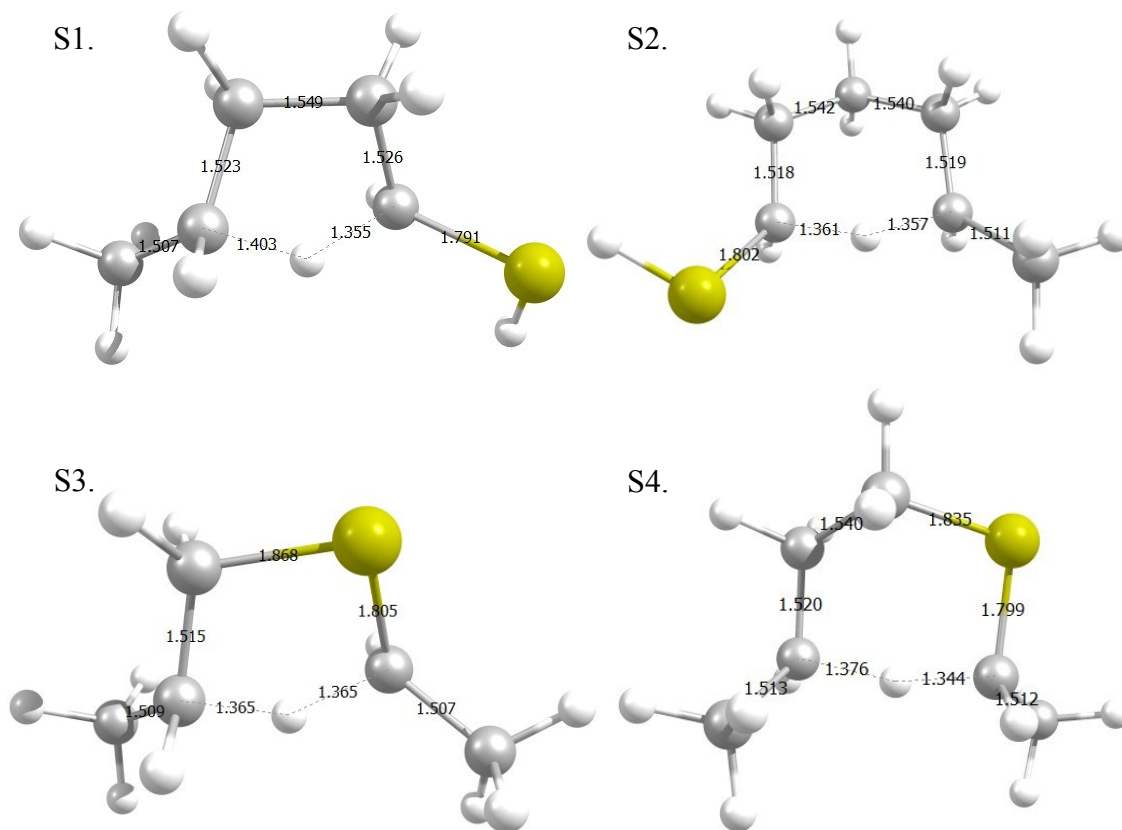

**Figure 1. Transition state geometries for the four hydrogen migration reactions. Distances (Ångstroms).**

**Table 1. Calculated rate constants for hydrogen migration reactions.  $A$  ( $s^{-1}$ ),  $n$  (unitless), and  $E_a$  (kJ/mol).**

| Reactions                                                                             | Rate Parameters |      |       | Reverse  |      |       |
|---------------------------------------------------------------------------------------|-----------------|------|-------|----------|------|-------|
|                                                                                       | $\log A$        | $n$  | $E_a$ | $\log A$ | $n$  | $E_a$ |
| S1.  | -4.75           | 4.50 | 49.91 | -3.34    | 4.07 | 69.27 |
| S2.  | -1.29           | 3.24 | 29.04 | 0.11     | 2.82 | 48.56 |
| S3.  | -2.94           | 3.95 | 46.73 | -1.79    | 3.74 | 69.22 |
| S4.  | -1.55           | 3.28 | 24.73 | 0.43     | 2.76 | 51.66 |

## S1.2 Radical Addition to Multiple Bond

Six radical addition reactions—beta scission reactions in the reverse direction—were considered for this work. These proceed via the pathway shown in Figure 2, and the calculated modified Arrhenius parameters are presented in Table 2. Reactions S5 through S9 were chosen as possible consumption reactions for the thioaldehyde formed from hexyl sulfide decomposition. Radical addition to the sulfur atom in the C-S double bond were not calculated in this work, as rate parameters for many of these reactions have previously been calculated and added to the RMG database.<sup>1</sup> Reactions S10 through S12 are relevant to hexyl sulfide decomposition in the beta scission direction, as they are possible final steps in the production of thiophenic compounds from hexyl sulfide.

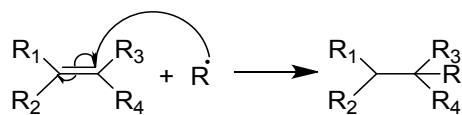

**Figure 2. A radical addition reaction.**

Activation energies for the four reactions involving addition of a radical to the thiocarbonyl group were all below 5 kJ/mol, and negative activation energies were fit to reactions S6 and S8 (although the overall rate constants exhibit the usual positive temperature dependence when including the temperature exponential  $n$ ). This is due to the instability of thiocarbonyl compounds, which are known to polymerize at room temperature.<sup>2</sup> The energetics of reaction S9 reveal a submerged transition state, and a complex was optimized near this geometry. A rate constant for this reaction was estimated using the method described in section S1.3.

**Table 2.** Calculated rate constants for radical addition and beta scission reactions.  $A$  [ $\text{cm}^3/(\text{mol}\cdot\text{s})$ ],  $n$  (unitless), and  $E_a$  (kJ/mol).

| Reactions                                                                               | Rate Parameters |      |       |
|-----------------------------------------------------------------------------------------|-----------------|------|-------|
|                                                                                         | $\log A$        | $n$  | $E_a$ |
| S5. 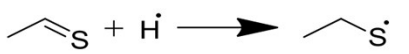   | 9.07            | 1.46 | 4.92  |
| S6.    | 0.19            | 3.16 | -6.73 |
| S7.    | 3.24            | 2.50 | 2.26  |
| S8.    | 1.58            | 2.82 | -5.14 |
| S9.    | 12.2            | 0.03 | 2.10  |
| S10.   | 7.40            | 1.76 | 9.89  |
| S11.   | 1.99            | 3.25 | 24.33 |
| S12.  | 4.06            | 2.56 | 11.09 |

Larger activation energies were calculated for the addition of a radical to a stable thiophenic compound (reactions S10-S12). Of more interest to this work is the reverse direction for reactions S10 and S11, which can be estimated using thermodynamic consistency. Beta scission of the ethyl radical from the initial cyclic radical occurs via a significantly lower energy pathway than beta scission of hydrogen. Thus, if beta scission of this radical were the primary method of generating thiophenic compounds from hexyl sulfide, the production of thiophene over ethyl thiophene would be expected, in disagreement with experimental data. However, disproportionation reactions also promote the generation of ethyl thiophene, and this could help explain the experimental results. The beta scission of the vinyl radical to form thiophene, the reverse of reaction S12, has a high activation energy. This species would be more likely to undergo radical-mediated tautomerization to eventually form ethyl-thiophene, an experimentally observed pyrolysis product of hexyl sulfide. This mechanism is discussed further below.

### S1.3 Calculation of Rate Constants for Reactions with Submerged Transition States

The reaction barrier was calculated to be significantly negative (i.e. greater than the uncertainty of the calculations) for two of the reactions studied in this work, implying the existence of reactive complexes at lower energy levels than the reactants of the respective reactions. This type of “submerged-barrier” reaction is illustrated in Figure 3. The same methods as discussed previously for reactants and products were used to calculate energies and frequencies for the reactive complex of each reaction.

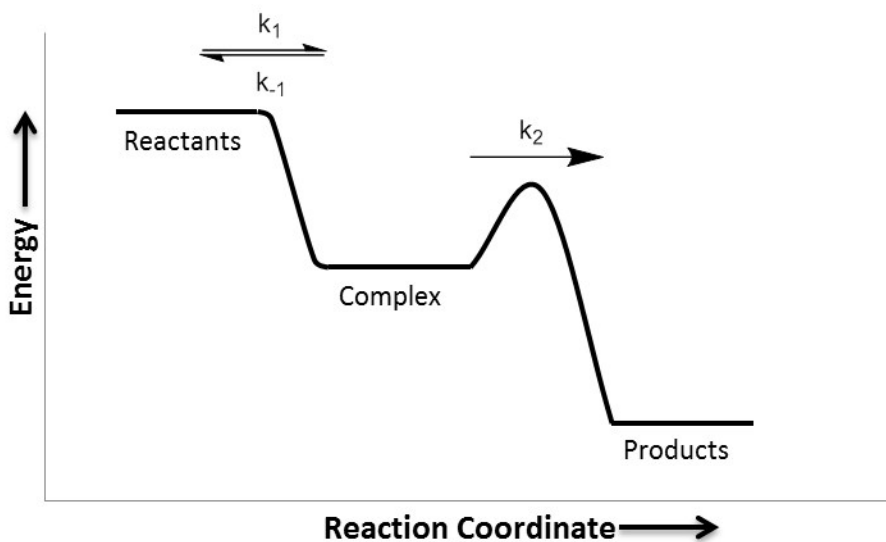

Figure 3. Potential energy surface for a generic reaction with a submerged transition state.

The parameters for each submerged reaction were calculated for the high-pressure limit using CanTherm. The rate  $k_1$  for the formation of complex was assumed to be the collision rate,  $10^{13} \text{ cm}^3/(\text{mol}\cdot\text{s})$ , and  $k_{-1}$  was calculated using thermochemical consistency. The rate of formation of products from the pre-reactive complex,  $k_2$ , was calculated using transition-state theory. The complex is short-lived, so it can be modeled using the quasi-steady-state approximation. The overall rate of product formation for a reaction with two reactants is therefore

$$\frac{dC_p}{dt} = \frac{k_1 k_2}{k_{-1} + k_2} C_{R_1} C_{R_2}$$

and the effective rate constant is

$k_{eff}(T) = \frac{k_1 k_2}{k_{-1} + k_2}$  The effective rate constant  $k_{eff}(T)$  was calculated at temperatures between 300 and 2000 K, and modified Arrhenius parameters were fit to these calculations to obtain the values reported in the Tables for Reactions 21 and 37. As our primary interest is in supercritical water reactions (with pressures greater than 200 bar), rate constants are reported in the high pressure limit. In some gas-phase situations, the low-pressure limit might be more appropriate than the high-pressure limit values reported here.

## **S2H<sub>2</sub>O catalysis of hydrogen transfer reactions**

We conducted a literature survey to better understand the impact of water on the rate of tautomerization reactions in organic compounds<sup>3-9</sup>. Reported activation energies and Gibbs free energies of activation are presented in Table 3. The assistance of one water molecule consistently decreases the activation barrier by about half, which would increase the reaction rate by multiple orders of magnitude at the SCW concentration in our study. While the tautomerization reactions of Deng *et al.* were included in the RMG database for this study, many more H<sub>2</sub>O-assisted hydrogen transfer reactions are possible, and a thorough study of their reaction rates would likely improve the quantitative product predictions of our model.

**Table 3. Reported activation energies ( $E_a$ ) or Gibbs free energies of activation ( $\Delta^\ddagger G$ ) for tautomerization reactions in the gas phase. Rate constants for the unimolecular reaction and the reaction assisted by one water molecule are presented, as well as the ratio of the two. Reactions are presented in the endothermic direction.**

| Reaction                                                                          | Source                        | Unimolecular |                     | H2O-Assisted |                     | Ratio<br>(H2O-Assisted / Unimolecular) |                     |
|-----------------------------------------------------------------------------------|-------------------------------|--------------|---------------------|--------------|---------------------|----------------------------------------|---------------------|
|                                                                                   |                               | $E_a$        | $\Delta^\ddagger G$ | $E_a$        | $\Delta^\ddagger G$ | $E_a$                                  | $\Delta^\ddagger G$ |
| 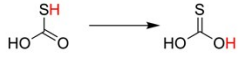 | Deng <i>et al.</i> (2007)     | 132.1        |                     | 63.2         |                     | 0.48                                   |                     |
|  | Deng <i>et al.</i> (2008)     |              | 131.0               |              | 69.7                |                                        | 0.53                |
|  | Fu <i>et al.</i> (2003)       | 186.5        |                     | 82.2         |                     | 0.44                                   |                     |
|  | Li <i>et al.</i> (2008)       |              | 157.3               |              | 74.5                |                                        | 0.47                |
|  | Hajipour <i>et al.</i> (2016) | 189.0        |                     | 90.9         |                     | 0.48                                   |                     |
|  | Hajipour <i>et al.</i> (2016) | 184.9        |                     | 121.2        |                     |                                        |                     |
|  | Trujillo <i>et al.</i> (2007) | 157.7        |                     | 81.2         |                     | 0.51                                   |                     |
|  | Trujillo <i>et al.</i> (2007) | 128.9        |                     | 69.5         |                     | 0.54                                   |                     |
|  | Trujillo <i>et al.</i> (2007) | 171.1        |                     | 64.9         |                     | 0.38                                   |                     |
|                                                                                   |                               |              |                     |              |                     | <b>Average =</b>                       | <b>0.47</b>         |
|                                                                                   |                               |              |                     |              |                     | <b>Std. Dev. =</b>                     | <b>0.057</b>        |

### S3References

1. A. G. Vandeputte, PhD Thesis. University of Ghent, 2012.
2. N. J. Cooper, *Compr. Org. Funct. Group Transform. II*, 2005, **3**, 355-396.
3. A.-P. Fu, H.-L. Li, D.-M. Du and Z.-Y. Zhou, *Chemical Physics Letters*, 2003, **382**, 332-337.
4. X.-C. Wang, J. Nichols, M. Feyereisen, M. Gutowski, J. Boatz, A. D. J. Haymet and J. Simons, *J. Phys. Chem.*, 1991, **95**, 10419-10424.
5. Q.-G. Li, Y. Xue and G.-s. Yan, *Journal of Molecular Structure (Theochem)*, 2008, **868**, 55-64.
6. A. R. Hajipour, M. Karimzadeh, S. Ghorbani, H. Farrokhpour and A. N. Chermahini, *Struct. Chem.*, 2016, **27**, 1345-1362.
7. C. Trujillo, O. Mó and M. Yáñez, *Org. Biomol. Chem.*, 2007, **5**, 3092-3099.
8. C. Deng, Q.-G. Li, Y. Ren, N.-B. Wong, S.-Y. Chu and H.-J. Zhu, *Journal of Computational Chemistry*, 2007, **29**, 466-480.
9. C. Deng, X.-P. Wu, X.-M. Sun, Y. Ren and Y.-H. Sheng, *Journal of Computational Chemistry*, 2008, **30**, 285-294.

## S4 Optimized geometries

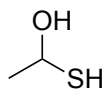

0 1

C

|   |   |    |   |    |   |
|---|---|----|---|----|---|
| H | 1 | B1 |   |    |   |
| S | 1 | B2 | 2 | A1 |   |
| H | 1 | B3 | 3 | A2 | 2 |
| O | 1 | B4 | 3 | A3 | 2 |
| H | 3 | B5 | 1 | A4 | 5 |
| C | 1 | B6 | 5 | A5 | 3 |
| H | 7 | B7 | 1 | A6 | 5 |
| H | 7 | B8 | 1 | A7 | 5 |
| H | 7 | B9 | 1 | A8 | 5 |

|    |               |
|----|---------------|
| B1 | 1.08942056    |
| B2 | 1.86212814    |
| B3 | 1.93258637    |
| B4 | 1.40618355    |
| B5 | 1.34374699    |
| B6 | 1.52450124    |
| B7 | 1.09213032    |
| B8 | 1.09216321    |
| B9 | 1.09430327    |
| A1 | 107.43710284  |
| A2 | 95.69966608   |
| A3 | 112.16537584  |
| A4 | 95.43657376   |
| A5 | 112.90485694  |
| A6 | 111.56130222  |
| A7 | 108.84778614  |
| A8 | 110.84308365  |
| D1 | 139.38757587  |
| D2 | 115.43728334  |
| D3 | 56.61660460   |
| D4 | -122.50257855 |
| D5 | -174.28312724 |
| D6 | -54.12186971  |
| D7 | 64.87864161   |

H<sub>2</sub>S



01  
 S  
 H 1 B1  
 H 1 B2 2 A1

B1 1.34327993  
 B2 1.34327993  
 A1 92.58329996

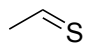

01  
 C  
 H 1 B1  
 C 1 B2 2 A1  
 H 3 B3 1 A2 2 D1  
 S 3 B4 1 A3 2 D2  
 H 1 B5 3 A4 5 D3  
 H 1 B6 3 A5 5 D4

B1 1.08911236  
 B2 1.49291678  
 B3 1.09300816  
 B4 1.61980609  
 B5 1.09733033  
 B6 1.09697723  
 A1 111.78326121  
 A2 114.81232591  
 A3 126.45725204  
 A4 109.77445206  
 A5 109.77061696  
 D1 -179.94981833  
 D2 0.08504453  
 D3 -121.81265346  
 D4 121.94294055

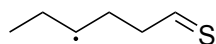

02  
 C  
 H 1 B1  
 H 1 B2 2 A1  
 H 1 B3 2 A2 3 D1  
 C 1 B4 4 A3 3 D2  
 H 5 B5 1 A4 4 D3

|   |    |     |    |     |    |     |
|---|----|-----|----|-----|----|-----|
| H | 5  | B6  | 1  | A5  | 4  | D4  |
| C | 5  | B7  | 1  | A6  | 4  | D5  |
| H | 8  | B8  | 5  | A7  | 1  | D6  |
| C | 8  | B9  | 5  | A8  | 1  | D7  |
| H | 10 | B10 | 8  | A9  | 5  | D8  |
| H | 10 | B11 | 8  | A10 | 5  | D9  |
| C | 10 | B12 | 8  | A11 | 5  | D10 |
| H | 13 | B13 | 10 | A12 | 8  | D11 |
| H | 13 | B14 | 10 | A13 | 8  | D12 |
| C | 13 | B15 | 10 | A14 | 8  | D13 |
| H | 16 | B16 | 13 | A15 | 10 | D14 |
| S | 16 | B17 | 13 | A16 | 10 | D15 |

|     |              |
|-----|--------------|
| B1  | 1.09310789   |
| B2  | 1.09388454   |
| B3  | 1.09285837   |
| B4  | 1.53433172   |
| B5  | 1.10523140   |
| B6  | 1.09856903   |
| B7  | 1.49260949   |
| B8  | 1.08698919   |
| B9  | 1.48920787   |
| B10 | 1.09409912   |
| B11 | 1.09704788   |
| B12 | 1.57236339   |
| B13 | 1.09724133   |
| B14 | 1.09097175   |
| B15 | 1.49172405   |
| B16 | 1.09389876   |
| B17 | 1.62211117   |
| A1  | 107.75230659 |
| A2  | 108.08296575 |
| A3  | 111.19337110 |
| A4  | 108.45192165 |
| A5  | 109.89588706 |
| A6  | 113.71598353 |
| A7  | 118.16296066 |
| A8  | 122.30831875 |
| A9  | 110.49053739 |
| A10 | 110.29638092 |
| A11 | 112.78828438 |
| A12 | 107.99698193 |
| A13 | 109.85026660 |
| A14 | 111.23421744 |
| A15 | 114.75607469 |
| A16 | 126.45855111 |

|     |               |
|-----|---------------|
| D1  | 116.19069085  |
| D2  | 121.79168535  |
| D3  | -56.31432391  |
| D4  | 57.74645191   |
| D5  | -179.14015813 |
| D6  | 31.45280111   |
| D7  | -162.45426098 |
| D8  | 158.94437424  |
| D9  | 40.44536418   |
| D10 | -80.67199560  |
| D11 | 58.97703786   |
| D12 | -59.38411526  |
| D13 | 178.20276063  |
| D14 | -65.68061072  |
| D15 | 112.15965035  |

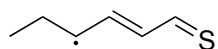

|   |    |     |    |     |    |     |
|---|----|-----|----|-----|----|-----|
| C |    |     |    |     |    |     |
| H | 1  | B1  |    |     |    |     |
| H | 1  | B2  | 2  | A1  |    |     |
| H | 1  | B3  | 3  | A2  | 2  | D1  |
| C | 1  | B4  | 4  | A3  | 3  | D2  |
| H | 5  | B5  | 1  | A4  | 4  | D3  |
| H | 5  | B6  | 1  | A5  | 4  | D4  |
| C | 5  | B7  | 1  | A6  | 4  | D5  |
| H | 8  | B8  | 5  | A7  | 1  | D6  |
| C | 8  | B9  | 5  | A8  | 1  | D7  |
| H | 10 | B10 | 8  | A9  | 5  | D8  |
| C | 10 | B11 | 8  | A10 | 5  | D9  |
| H | 12 | B12 | 10 | A11 | 8  | D10 |
| C | 12 | B13 | 10 | A12 | 8  | D11 |
| H | 14 | B14 | 12 | A13 | 10 | D12 |
| S | 14 | B15 | 12 | A14 | 10 | D13 |

|     |            |
|-----|------------|
| B1  | 1.09329581 |
| B2  | 1.09329466 |
| B3  | 1.09214141 |
| B4  | 1.52908644 |
| B5  | 1.09931982 |
| B6  | 1.09931502 |
| B7  | 1.49740746 |
| B8  | 1.08885427 |
| B9  | 1.35829549 |
| B10 | 1.08675247 |

|     |               |
|-----|---------------|
| B11 | 1.42261083    |
| B12 | 1.08674783    |
| B13 | 1.39003439    |
| B14 | 1.09069031    |
| B15 | 1.67853720    |
| A1  | 107.99430779  |
| A2  | 107.64817564  |
| A3  | 110.32516062  |
| A4  | 109.76029717  |
| A5  | 109.76146734  |
| A6  | 116.58552993  |
| A7  | 115.43508277  |
| A8  | 126.86618093  |
| A9  | 119.58564765  |
| A10 | 123.22166677  |
| A11 | 118.51329727  |
| A12 | 123.71623936  |
| A13 | 117.24519891  |
| A14 | 124.46626726  |
| D1  | -115.96653981 |
| D2  | 121.90303240  |
| D3  | -57.03802830  |
| D4  | 57.03230689   |
| D5  | 180.00000000  |
| D6  | -179.99100461 |
| D7  | 0.00966225    |
| D8  | -0.00000000   |
| D9  | 180.00000000  |
| D10 | 0.00000000    |
| D11 | -180.00000000 |
| D12 | -0.00544796   |
| D13 | -179.99612777 |

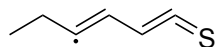

02

C

|   |   |    |   |    |    |
|---|---|----|---|----|----|
| C | 1 | B1 |   |    |    |
| H | 2 | B2 | 1 | A1 |    |
| C | 2 | B3 | 1 | A2 | 3  |
| H | 4 | B4 | 2 | A3 | 1  |
| C | 4 | B5 | 2 | A4 | 1  |
| S | 6 | B6 | 4 | A5 | 2  |
| C | 1 | B7 | 2 | A6 | 4  |
| H | 8 | B8 | 1 | A7 | 2  |
|   |   |    |   |    | D1 |
|   |   |    |   |    | D2 |
|   |   |    |   |    | D3 |
|   |   |    |   |    | D4 |
|   |   |    |   |    | D5 |
|   |   |    |   |    | D6 |

|   |    |     |   |     |   |     |
|---|----|-----|---|-----|---|-----|
| H | 8  | B9  | 1 | A8  | 2 | D7  |
| C | 8  | B10 | 1 | A9  | 2 | D8  |
| H | 11 | B11 | 8 | A10 | 1 | D9  |
| H | 11 | B12 | 8 | A11 | 1 | D10 |
| H | 11 | B13 | 8 | A12 | 1 | D11 |

|     |               |
|-----|---------------|
| B1  | 1.31885833    |
| B2  | 1.08811509    |
| B3  | 1.47379936    |
| B4  | 1.08703509    |
| B5  | 1.31492787    |
| B6  | 1.56131445    |
| B7  | 1.46895435    |
| B8  | 1.09711358    |
| B9  | 1.10378463    |
| B10 | 1.53970500    |
| B11 | 1.09284792    |
| B12 | 1.09217522    |
| B13 | 1.09214021    |
| A1  | 119.45639330  |
| A2  | 124.71545427  |
| A3  | 118.70740921  |
| A4  | 124.27682494  |
| A5  | 179.32526106  |
| A6  | 142.16379251  |
| A7  | 109.36782904  |
| A8  | 108.92444022  |
| A9  | 113.74556529  |
| A10 | 110.49832941  |
| A11 | 110.88945985  |
| A12 | 110.75361716  |
| D1  | -179.86895412 |
| D2  | 0.06813492    |
| D3  | -179.94115088 |
| D4  | -4.78838976   |
| D5  | 0.40776337    |
| D6  | -119.07667031 |
| D7  | -4.03555053   |
| D8  | 118.28537053  |
| D9  | 179.77393524  |
| D10 | -60.02063384  |
| D11 | 59.82850691   |

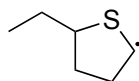

02

|   |    |     |    |     |    |     |
|---|----|-----|----|-----|----|-----|
| C |    |     |    |     |    |     |
| H | 1  | B1  |    |     |    |     |
| H | 1  | B2  | 2  | A1  |    |     |
| H | 1  | B3  | 3  | A2  | 2  | D1  |
| C | 1  | B4  | 3  | A3  | 4  | D2  |
| H | 5  | B5  | 1  | A4  | 3  | D3  |
| H | 5  | B6  | 1  | A5  | 3  | D4  |
| C | 5  | B7  | 1  | A6  | 3  | D5  |
| H | 8  | B8  | 5  | A7  | 1  | D6  |
| C | 8  | B9  | 5  | A8  | 1  | D7  |
| H | 10 | B10 | 8  | A9  | 5  | D8  |
| H | 10 | B11 | 8  | A10 | 5  | D9  |
| C | 10 | B12 | 8  | A11 | 5  | D10 |
| H | 13 | B13 | 10 | A12 | 8  | D11 |
| H | 13 | B14 | 10 | A13 | 8  | D12 |
| C | 13 | B15 | 10 | A14 | 8  | D13 |
| H | 16 | B16 | 13 | A15 | 10 | D14 |
| S | 16 | B17 | 13 | A16 | 10 | D15 |

|     |              |
|-----|--------------|
| B1  | 1.09471420   |
| B2  | 1.09277114   |
| B3  | 1.09296902   |
| B4  | 1.52999159   |
| B5  | 1.09468955   |
| B6  | 1.09782627   |
| B7  | 1.53471397   |
| B8  | 1.09278337   |
| B9  | 1.53971246   |
| B10 | 1.09305808   |
| B11 | 1.09405031   |
| B12 | 1.54021476   |
| B13 | 1.09584729   |
| B14 | 1.10238912   |
| B15 | 1.49603315   |
| B16 | 1.08049121   |
| B17 | 1.73613620   |
| A1  | 107.95416388 |
| A2  | 107.81988308 |
| A3  | 111.17978170 |
| A4  | 109.80171042 |
| A5  | 109.17527314 |
| A6  | 114.25851552 |
| A7  | 109.38261641 |
| A8  | 113.98506333 |

|     |               |
|-----|---------------|
| A9  | 109.02733813  |
| A10 | 110.53884416  |
| A11 | 108.27779757  |
| A12 | 111.20914484  |
| A13 | 110.40096173  |
| A14 | 105.80134345  |
| A15 | 125.47706642  |
| A16 | 114.05950160  |
| D1  | -116.07873164 |
| D2  | -121.76935181 |
| D3  | 61.76272368   |
| D4  | 178.29992708  |
| D5  | -61.55283334  |
| D6  | -51.95613016  |
| D7  | -176.56511592 |
| D8  | 157.78450806  |
| D9  | 39.39683073   |
| D10 | -83.75153155  |
| D11 | -160.38271532 |
| D12 | 82.14158744   |
| D13 | -38.73808290  |
| D14 | -172.47783544 |
| D15 | 21.35500734   |

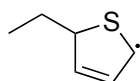

02

|   |    |     |    |     |    |     |
|---|----|-----|----|-----|----|-----|
| C |    |     |    |     |    |     |
| H | 1  | B1  |    |     |    |     |
| H | 1  | B2  | 2  | A1  |    |     |
| H | 1  | B3  | 2  | A2  | 3  | D1  |
| C | 1  | B4  | 4  | A3  | 2  | D2  |
| H | 5  | B5  | 1  | A4  | 4  | D3  |
| H | 5  | B6  | 1  | A5  | 4  | D4  |
| C | 5  | B7  | 1  | A6  | 4  | D5  |
| H | 8  | B8  | 5  | A7  | 1  | D6  |
| C | 8  | B9  | 5  | A8  | 1  | D7  |
| H | 10 | B10 | 8  | A9  | 5  | D8  |
| C | 10 | B11 | 8  | A10 | 5  | D9  |
| H | 12 | B12 | 10 | A11 | 8  | D10 |
| C | 12 | B13 | 10 | A12 | 8  | D11 |
| H | 14 | B14 | 12 | A13 | 10 | D12 |
| S | 14 | B15 | 12 | A14 | 10 | D13 |

|     |               |
|-----|---------------|
| B1  | 1.09344520    |
| B2  | 1.09452713    |
| B3  | 1.09283973    |
| B4  | 1.52992485    |
| B5  | 1.09704274    |
| B6  | 1.09389860    |
| B7  | 1.54061370    |
| B8  | 1.09829029    |
| B9  | 1.50302029    |
| B10 | 1.08281092    |
| B11 | 1.37442074    |
| B12 | 1.08385797    |
| B13 | 1.39443268    |
| B14 | 1.07937932    |
| B15 | 1.74518083    |
| A1  | 107.93349224  |
| A2  | 107.58631454  |
| A3  | 110.86328024  |
| A4  | 109.50260223  |
| A5  | 110.47582868  |
| A6  | 114.05016022  |
| A7  | 108.41977593  |
| A8  | 114.14436943  |
| A9  | 120.10383273  |
| A10 | 115.41736635  |
| A11 | 123.28737439  |
| A12 | 114.86719086  |
| A13 | 127.38854877  |
| A14 | 112.91914707  |
| D1  | 116.01549522  |
| D2  | -121.91987240 |
| D3  | -57.94072662  |
| D4  | 59.31901558   |
| D5  | -177.97565910 |
| D6  | 52.26207849   |
| D7  | 176.60773090  |
| D8  | -57.61119495  |
| D9  | 121.38186317  |
| D10 | -178.86645705 |
| D11 | 1.09375046    |
| D12 | -179.57074476 |
| D13 | 0.12529569    |

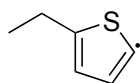



02

|   |    |     |   |     |   |     |
|---|----|-----|---|-----|---|-----|
| C |    |     |   |     |   |     |
| C | 1  | B1  |   |     |   |     |
| H | 2  | B2  | 1 | A1  |   |     |
| C | 2  | B3  | 1 | A2  | 3 | D1  |
| H | 4  | B4  | 2 | A3  | 1 | D2  |
| C | 4  | B5  | 2 | A4  | 1 | D3  |
| S | 6  | B6  | 4 | A5  | 2 | D4  |
| C | 1  | B7  | 2 | A6  | 4 | D5  |
| H | 8  | B8  | 1 | A7  | 2 | D6  |
| H | 8  | B9  | 1 | A8  | 2 | D7  |
| C | 8  | B10 | 1 | A9  | 2 | D8  |
| H | 11 | B11 | 8 | A10 | 1 | D9  |
| H | 11 | B12 | 8 | A11 | 1 | D10 |
| H | 11 | B13 | 8 | A12 | 1 | D11 |

|     |               |
|-----|---------------|
| B1  | 1.36771775    |
| B2  | 1.08403064    |
| B3  | 1.43923992    |
| B4  | 1.08116358    |
| B5  | 1.35056047    |
| B6  | 1.71023818    |
| B7  | 1.50243006    |
| B8  | 1.09559470    |
| B9  | 1.09508836    |
| B10 | 1.53805348    |
| B11 | 1.09341353    |
| B12 | 1.09260633    |
| B13 | 1.09290347    |
| A1  | 122.49641228  |
| A2  | 114.63590786  |
| A3  | 124.66411964  |
| A4  | 109.54424392  |
| A5  | 115.52087672  |
| A6  | 128.61758880  |
| A7  | 110.07553893  |
| A8  | 107.13671821  |
| A9  | 114.29346718  |
| A10 | 110.62424779  |
| A11 | 110.79354998  |
| A12 | 111.29558407  |
| D1  | 179.86269832  |
| D2  | -179.86836979 |
| D3  | 0.04713063    |

D4 -0.12037508  
 D5 -178.84548827  
 D6 -128.91797878  
 D7 -13.98396666  
 D8 107.51835347  
 D9 -178.00822943  
 D10 -57.83147303  
 D11 62.04934846

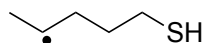

0 2

|   |    |     |    |     |    |
|---|----|-----|----|-----|----|
| C |    |     |    |     |    |
| H | 1  | B1  |    |     |    |
| H | 1  | B2  | 2  | A1  |    |
| H | 1  | B3  | 3  | A2  | 2  |
| C | 1  | B4  | 4  | A3  | 2  |
| H | 5  | B5  | 1  | A4  | 4  |
| C | 5  | B6  | 1  | A5  | 4  |
| H | 7  | B7  | 5  | A6  | 1  |
| H | 7  | B8  | 5  | A7  | 1  |
| C | 7  | B9  | 5  | A8  | 1  |
| H | 10 | B10 | 7  | A9  | 5  |
| H | 10 | B11 | 7  | A10 | 5  |
| C | 10 | B12 | 7  | A11 | 5  |
| H | 13 | B13 | 10 | A12 | 7  |
| H | 13 | B14 | 10 | A13 | 7  |
| S | 13 | B15 | 10 | A14 | 7  |
| H | 16 | B16 | 13 | A15 | 10 |

B1 1.10344680  
 B2 1.09688756  
 B3 1.09284247  
 B4 1.49021043  
 B5 1.08603472  
 B6 1.49291928  
 B7 1.09982298  
 B8 1.10619234  
 B9 1.53755681  
 B10 1.09452227  
 B11 1.09533725  
 B12 1.52748763  
 B13 1.09205797  
 B14 1.09340932  
 B15 1.83922317

|     |               |
|-----|---------------|
| B16 | 1.34458525    |
| A1  | 106.06279594  |
| A2  | 108.06352042  |
| A3  | 111.88409959  |
| A4  | 118.82372569  |
| A5  | 121.44216973  |
| A6  | 109.56922035  |
| A7  | 110.04282722  |
| A8  | 113.65266675  |
| A9  | 109.71235487  |
| A10 | 109.17588816  |
| A11 | 112.60118503  |
| A12 | 111.40707974  |
| A13 | 110.62999925  |
| A14 | 114.54062540  |
| A15 | 96.88508918   |
| D1  | 114.24493624  |
| D2  | 122.95872821  |
| D3  | -26.83769844  |
| D4  | 167.52805164  |
| D5  | -42.67916127  |
| D6  | 72.01003639   |
| D7  | -165.91445120 |
| D8  | -57.77797465  |
| D9  | 58.53599034   |
| D10 | -179.56035451 |
| D11 | -59.21716992  |
| D12 | 59.83534246   |
| D13 | 176.84768796  |
| D14 | 63.35245504   |

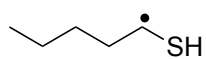

02

|   |   |     |   |    |   |    |
|---|---|-----|---|----|---|----|
| C |   |     |   |    |   |    |
| H | 1 | B1  |   |    |   |    |
| H | 1 | B2  | 2 | A1 |   |    |
| H | 1 | B3  | 3 | A2 | 2 | D1 |
| C | 1 | B4  | 4 | A3 | 2 | D2 |
| H | 5 | B5  | 1 | A4 | 4 | D3 |
| H | 5 | B6  | 1 | A5 | 4 | D4 |
| C | 5 | B7  | 1 | A6 | 4 | D5 |
| H | 8 | B8  | 5 | A7 | 1 | D6 |
| H | 8 | B9  | 5 | A8 | 1 | D7 |
| C | 8 | B10 | 5 | A9 | 1 | D8 |

|   |    |     |    |     |    |     |
|---|----|-----|----|-----|----|-----|
| H | 11 | B11 | 8  | A10 | 5  | D9  |
| H | 11 | B12 | 8  | A11 | 5  | D10 |
| C | 11 | B13 | 8  | A12 | 5  | D11 |
| H | 14 | B14 | 11 | A13 | 8  | D12 |
| S | 14 | B15 | 11 | A14 | 8  | D13 |
| H | 16 | B16 | 14 | A15 | 11 | D14 |

|     |              |
|-----|--------------|
| B1  | 1.09437594   |
| B2  | 1.09434246   |
| B3  | 1.09344181   |
| B4  | 1.53140092   |
| B5  | 1.09688813   |
| B6  | 1.09683815   |
| B7  | 1.53262511   |
| B8  | 1.09583629   |
| B9  | 1.09642010   |
| B10 | 1.54719245   |
| B11 | 1.09814658   |
| B12 | 1.09706177   |
| B13 | 1.49423924   |
| B14 | 1.08383802   |
| B15 | 1.74179628   |
| B16 | 1.34694757   |
| A1  | 107.54470796 |
| A2  | 107.68860065 |
| A3  | 111.39494765 |
| A4  | 109.46023750 |
| A5  | 109.45281685 |
| A6  | 113.13486852 |
| A7  | 109.74713976 |
| A8  | 109.61532506 |
| A9  | 113.03894380 |
| A10 | 108.62925433 |
| A11 | 108.63934999 |
| A12 | 114.68883038 |
| A13 | 120.52425296 |
| A14 | 123.66799617 |
| A15 | 97.79115791  |
| D1  | 115.78053599 |
| D2  | 122.13336018 |
| D3  | 57.77066912  |
| D4  | -58.08762216 |
| D5  | 179.80319741 |
| D6  | -58.30330375 |
| D7  | 58.06802994  |
| D8  | 179.83298302 |

D9 57.10961148  
 D10 -58.03072569  
 D11 -179.57885064  
 D12 78.99244843  
 D13 -79.73625074  
 D14 -29.74512234

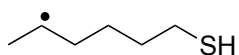

0 2

|   |    |     |    |     |    |     |
|---|----|-----|----|-----|----|-----|
| C |    |     |    |     |    |     |
| H | 1  | B1  |    |     |    |     |
| H | 1  | B2  | 2  | A1  |    |     |
| H | 1  | B3  | 2  | A2  | 3  | D1  |
| C | 1  | B4  | 4  | A3  | 3  | D2  |
| H | 5  | B5  | 1  | A4  | 4  | D3  |
| C | 5  | B6  | 1  | A5  | 4  | D4  |
| H | 7  | B7  | 5  | A6  | 1  | D5  |
| H | 7  | B8  | 5  | A7  | 1  | D6  |
| C | 7  | B9  | 5  | A8  | 1  | D7  |
| H | 10 | B10 | 7  | A9  | 5  | D8  |
| H | 10 | B11 | 7  | A10 | 5  | D9  |
| C | 10 | B12 | 7  | A11 | 5  | D10 |
| H | 13 | B13 | 10 | A12 | 7  | D11 |
| H | 13 | B14 | 10 | A13 | 7  | D12 |
| C | 13 | B15 | 10 | A14 | 7  | D13 |
| H | 16 | B16 | 13 | A15 | 10 | D14 |
| H | 16 | B17 | 13 | A16 | 10 | D15 |
| S | 16 | B18 | 13 | A17 | 10 | D16 |
| H | 19 | B19 | 16 | A18 | 13 | D17 |

B1 1.09693238  
 B2 1.10348692  
 B3 1.09290300  
 B4 1.49033418  
 B5 1.08619830  
 B6 1.49270223  
 B7 1.10603881  
 B8 1.09993724  
 B9 1.53564283  
 B10 1.09710444  
 B11 1.09637176  
 B12 1.53414845  
 B13 1.09648314  
 B14 1.09488872

|     |               |
|-----|---------------|
| B15 | 1.52808025    |
| B16 | 1.09332001    |
| B17 | 1.09194578    |
| B18 | 1.83982196    |
| B19 | 1.34451968    |
| A1  | 106.04346481  |
| A2  | 108.05402937  |
| A3  | 111.92791697  |
| A4  | 118.76751594  |
| A5  | 121.44484735  |
| A6  | 110.05285412  |
| A7  | 109.55938955  |
| A8  | 113.99338848  |
| A9  | 108.98625678  |
| A10 | 109.02040916  |
| A11 | 113.18969024  |
| A12 | 109.45846232  |
| A13 | 110.00063668  |
| A14 | 112.58148354  |
| A15 | 110.61594876  |
| A16 | 111.38030167  |
| A17 | 114.60609155  |
| A18 | 96.87412509   |
| D1  | -114.23310363 |
| D2  | -122.98873031 |
| D3  | 26.90037035   |
| D4  | -167.42934462 |
| D5  | -71.00933683  |
| D6  | 43.56428217   |
| D7  | 166.75474009  |
| D8  | 57.17748196   |
| D9  | -58.43056346  |
| D10 | 179.11530404  |
| D11 | 58.10182603   |
| D12 | -58.37953630  |
| D13 | 179.75968776  |
| D14 | 59.98910632   |
| D15 | -59.03844588  |
| D16 | 176.99818612  |
| D17 | 63.71986805   |

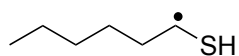

02  
C

|   |    |     |    |     |    |     |
|---|----|-----|----|-----|----|-----|
| H | 1  | B1  |    |     |    |     |
| H | 1  | B2  | 2  | A1  |    |     |
| C | 1  | B3  | 3  | A2  | 2  | D1  |
| H | 4  | B4  | 1  | A3  | 3  | D2  |
| H | 4  | B5  | 1  | A4  | 3  | D3  |
| C | 4  | B6  | 1  | A5  | 3  | D4  |
| H | 7  | B7  | 4  | A6  | 1  | D5  |
| H | 7  | B8  | 4  | A7  | 1  | D6  |
| C | 7  | B9  | 4  | A8  | 1  | D7  |
| H | 10 | B10 | 7  | A9  | 4  | D8  |
| H | 10 | B11 | 7  | A10 | 4  | D9  |
| C | 10 | B12 | 7  | A11 | 4  | D10 |
| H | 13 | B13 | 10 | A12 | 7  | D11 |
| S | 13 | B14 | 10 | A13 | 7  | D12 |
| H | 15 | B15 | 13 | A14 | 10 | D13 |
| C | 1  | B16 | 4  | A15 | 7  | D14 |
| H | 17 | B17 | 1  | A16 | 4  | D15 |
| H | 17 | B18 | 1  | A17 | 4  | D16 |
| H | 17 | B19 | 1  | A18 | 4  | D17 |

|     |              |
|-----|--------------|
| B1  | 1.09661673   |
| B2  | 1.09657838   |
| B3  | 1.53321189   |
| B4  | 1.09790255   |
| B5  | 1.09785135   |
| B6  | 1.53242581   |
| B7  | 1.09565241   |
| B8  | 1.09628750   |
| B9  | 1.54743586   |
| B10 | 1.09805638   |
| B11 | 1.09708769   |
| B12 | 1.49421358   |
| B13 | 1.08386455   |
| B14 | 1.74179327   |
| B15 | 1.34700872   |
| B16 | 1.53145901   |
| B17 | 1.09449853   |
| B18 | 1.09338835   |
| B19 | 1.09450428   |
| A1  | 106.06303098 |
| A2  | 109.17762482 |
| A3  | 109.16722148 |
| A4  | 109.17009723 |
| A5  | 113.51210679 |
| A6  | 109.82911561 |
| A7  | 109.66910485 |

|     |               |
|-----|---------------|
| A8  | 113.00371607  |
| A9  | 108.65965733  |
| A10 | 108.62906117  |
| A11 | 114.63527869  |
| A12 | 120.49436712  |
| A13 | 123.67991100  |
| A14 | 97.79135995   |
| A15 | 113.25095718  |
| A16 | 111.19706282  |
| A17 | 111.41703044  |
| A18 | 111.18734464  |
| D1  | -117.50885833 |
| D2  | -64.58672729  |
| D3  | 179.92559226  |
| D4  | 57.63174729   |
| D5  | -58.54141708  |
| D6  | 57.94153858   |
| D7  | 179.63479158  |
| D8  | 56.88843200   |
| D9  | -58.26893560  |
| D10 | -179.79725037 |
| D11 | 78.40144455   |
| D12 | -80.31720856  |
| D13 | -30.11089513  |
| D14 | 179.87788929  |
| D15 | 59.97113905   |
| D16 | -179.92932860 |
| D17 | -59.83778558  |

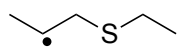

02

|   |    |     |   |       |     |
|---|----|-----|---|-------|-----|
| C |    |     |   |       |     |
| H | 1  | B1  |   |       |     |
| H | 1  | B2  | 2 | A1    |     |
| H | 1  | B3  | 3 | A2 2  | D1  |
| C | 1  | B4  | 3 | A3 2  | D2  |
| H | 5  | B5  | 1 | A4 3  | D3  |
| H | 5  | B6  | 1 | A5 3  | D4  |
| S | 5  | B7  | 1 | A6 3  | D5  |
| C | 8  | B8  | 5 | A7 1  | D6  |
| H | 9  | B9  | 8 | A8 5  | D7  |
| H | 9  | B10 | 8 | A9 5  | D8  |
| C | 9  | B11 | 8 | A10 5 | D9  |
| H | 12 | B12 | 9 | A11 8 | D10 |



|   |    |     |    |     |   |     |
|---|----|-----|----|-----|---|-----|
| C | 12 | B13 | 9  | A12 | 8 | D11 |
| H | 14 | B14 | 12 | A13 | 9 | D12 |
| H | 14 | B15 | 12 | A14 | 9 | D13 |
| H | 14 | B16 | 12 | A15 | 9 | D14 |

|     |               |
|-----|---------------|
| B1  | 1.09271677    |
| B2  | 1.09265235    |
| B3  | 1.09377436    |
| B4  | 1.52724888    |
| B5  | 1.09358729    |
| B6  | 1.09195017    |
| B7  | 1.83440046    |
| B8  | 1.88287850    |
| B9  | 1.09376194    |
| B10 | 1.09183073    |
| B11 | 1.47362455    |
| B12 | 1.08519601    |
| B13 | 1.49013393    |
| B14 | 1.10109964    |
| B15 | 1.09616604    |
| B16 | 1.09284796    |
| A1  | 108.04440509  |
| A2  | 108.02089606  |
| A3  | 111.31684300  |
| A4  | 110.51930765  |
| A5  | 110.43099396  |
| A6  | 110.08904600  |
| A7  | 100.42428937  |
| A8  | 102.38060518  |
| A9  | 106.53701036  |
| A10 | 114.26470287  |
| A11 | 118.20412467  |
| A12 | 121.90791778  |
| A13 | 111.64924626  |
| A14 | 111.54057989  |
| A15 | 111.65635220  |
| D1  | -116.56362123 |
| D2  | 122.42908645  |
| D3  | 59.65423445   |
| D4  | 179.55725140  |
| D5  | -60.10680984  |
| D6  | 178.34650360  |
| D7  | -168.86417849 |
| D8  | -55.16009491  |
| D9  | 69.87717898   |
| D10 | -89.67578375  |

D11 77.22947833  
 D12 -76.75216252  
 D13 42.01492737  
 D14 163.34361113

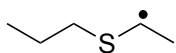

02

|   |    |     |    |     |   |
|---|----|-----|----|-----|---|
| C |    |     |    |     |   |
| H | 1  | B1  |    |     |   |
| H | 1  | B2  | 2  | A1  |   |
| H | 1  | B3  | 2  | A2  | 3 |
| C | 1  | B4  | 2  | A3  | 3 |
| H | 5  | B5  | 1  | A4  | 2 |
| S | 5  | B6  | 1  | A5  | 2 |
| C | 7  | B7  | 5  | A6  | 1 |
| H | 8  | B8  | 7  | A7  | 5 |
| H | 8  | B9  | 7  | A8  | 5 |
| C | 8  | B10 | 7  | A9  | 5 |
| H | 11 | B11 | 8  | A10 | 7 |
| H | 11 | B12 | 8  | A11 | 7 |
| C | 11 | B13 | 8  | A12 | 7 |
| H | 14 | B14 | 11 | A13 | 8 |
| H | 14 | B15 | 11 | A14 | 8 |
| H | 14 | B16 | 11 | A15 | 8 |

|     |              |
|-----|--------------|
| B1  | 1.09414091   |
| B2  | 1.10113021   |
| B3  | 1.09443863   |
| B4  | 1.49343645   |
| B5  | 1.08541322   |
| B6  | 1.73274522   |
| B7  | 1.83218423   |
| B8  | 1.09404430   |
| B9  | 1.09332755   |
| B10 | 1.52990294   |
| B11 | 1.09436275   |
| B12 | 1.09389399   |
| B13 | 1.53259726   |
| B14 | 1.09436449   |
| B15 | 1.09307217   |
| B16 | 1.09440605   |
| A1  | 107.04957715 |
| A2  | 107.80221581 |
| A3  | 111.53048270 |

|     |               |
|-----|---------------|
| A4  | 120.11163500  |
| A5  | 119.44121609  |
| A6  | 101.69939229  |
| A7  | 107.80488042  |
| A8  | 104.66655539  |
| A9  | 114.39970067  |
| A10 | 108.95337647  |
| A11 | 108.99046866  |
| A12 | 112.23919385  |
| A13 | 111.38796138  |
| A14 | 110.93224589  |
| A15 | 111.39177797  |
| D1  | 114.64447126  |
| D2  | -123.94848813 |
| D3  | -162.88730087 |
| D4  | 38.64174535   |
| D5  | -172.22751234 |
| D6  | -52.63115202  |
| D7  | -166.61697929 |
| D8  | 71.74811612   |
| D9  | 57.96880275   |
| D10 | -57.71971942  |
| D11 | -179.87142656 |
| D12 | 60.27050479   |
| D13 | -179.83750211 |
| D14 | -59.94787782  |

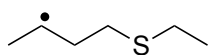

02

|   |    |     |    |     |   |     |
|---|----|-----|----|-----|---|-----|
| C |    |     |    |     |   |     |
| H | 1  | B1  |    |     |   |     |
| H | 1  | B2  | 2  | A1  |   |     |
| H | 1  | B3  | 3  | A2  | 2 | D1  |
| C | 1  | B4  | 3  | A3  | 2 | D2  |
| H | 5  | B5  | 1  | A4  | 3 | D3  |
| H | 5  | B6  | 1  | A5  | 3 | D4  |
| S | 5  | B7  | 1  | A6  | 3 | D5  |
| C | 8  | B8  | 5  | A7  | 1 | D6  |
| H | 9  | B9  | 8  | A8  | 5 | D7  |
| H | 9  | B10 | 8  | A9  | 5 | D8  |
| C | 9  | B11 | 8  | A10 | 5 | D9  |
| H | 12 | B12 | 9  | A11 | 8 | D10 |
| C | 12 | B13 | 9  | A12 | 8 | D11 |
| H | 14 | B14 | 12 | A13 | 9 | D12 |

|   |    |     |    |     |   |     |
|---|----|-----|----|-----|---|-----|
| H | 14 | B15 | 12 | A14 | 9 | D13 |
| H | 14 | B16 | 12 | A15 | 9 | D14 |
| C | 12 | B17 | 9  | A16 | 8 | D15 |
| H | 18 | B18 | 12 | A17 | 9 | D16 |
| H | 18 | B19 | 12 | A18 | 9 | D17 |

|     |               |
|-----|---------------|
| B1  | 1.09277969    |
| B2  | 1.09258394    |
| B3  | 1.09355656    |
| B4  | 1.52728770    |
| B5  | 1.09330684    |
| B6  | 1.09216568    |
| B7  | 1.83554925    |
| B8  | 1.82975765    |
| B9  | 1.09348989    |
| B10 | 1.09348128    |
| B11 | 2.52361492    |
| B12 | 1.08652485    |
| B13 | 1.49038817    |
| B14 | 1.09294299    |
| B15 | 1.09669765    |
| B16 | 1.10333416    |
| B17 | 1.49384392    |
| B18 | 1.10347347    |
| B19 | 1.09701908    |
| A1  | 108.05652226  |
| A2  | 108.07105361  |
| A3  | 111.25158724  |
| A4  | 110.56509957  |
| A5  | 110.26314513  |
| A6  | 109.93415826  |
| A7  | 101.28609150  |
| A8  | 104.38061938  |
| A9  | 108.71896899  |
| A10 | 148.30033026  |
| A11 | 89.18202024   |
| A12 | 151.84117362  |
| A13 | 111.88991989  |
| A14 | 111.60404590  |
| A15 | 112.01505484  |
| A16 | 34.07328091   |
| A17 | 110.82148399  |
| A18 | 109.58097577  |
| D1  | -116.54169504 |
| D2  | 122.41178226  |
| D3  | 59.39695844   |

|     |               |
|-----|---------------|
| D4  | 179.20590308  |
| D5  | -60.09399796  |
| D6  | 176.30718585  |
| D7  | -165.22060035 |
| D8  | -51.26003947  |
| D9  | 77.68420306   |
| D10 | 143.37522365  |
| D11 | -45.12381613  |
| D12 | -142.80192222 |
| D13 | -21.50086035  |
| D14 | 97.29487882   |
| D15 | -6.14101574   |
| D16 | 121.40353523  |
| D17 | -122.95679296 |

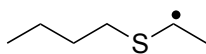

02

|   |    |     |    |     |    |     |
|---|----|-----|----|-----|----|-----|
| C |    |     |    |     |    |     |
| H | 1  | B1  |    |     |    |     |
| H | 1  | B2  | 2  | A1  |    |     |
| H | 1  | B3  | 2  | A2  | 3  | D1  |
| C | 1  | B4  | 2  | A3  | 3  | D2  |
| H | 5  | B5  | 1  | A4  | 2  | D3  |
| S | 5  | B6  | 1  | A5  | 2  | D4  |
| C | 7  | B7  | 5  | A6  | 1  | D5  |
| H | 8  | B8  | 7  | A7  | 5  | D6  |
| H | 8  | B9  | 7  | A8  | 5  | D7  |
| C | 8  | B10 | 7  | A9  | 5  | D8  |
| H | 11 | B11 | 8  | A10 | 7  | D9  |
| H | 11 | B12 | 8  | A11 | 7  | D10 |
| C | 11 | B13 | 8  | A12 | 7  | D11 |
| H | 14 | B14 | 11 | A13 | 8  | D12 |
| H | 14 | B15 | 11 | A14 | 8  | D13 |
| C | 14 | B16 | 11 | A15 | 8  | D14 |
| H | 17 | B17 | 14 | A16 | 11 | D15 |
| H | 17 | B18 | 14 | A17 | 11 | D16 |
| H | 17 | B19 | 14 | A18 | 11 | D17 |

|    |            |
|----|------------|
| B1 | 1.09417480 |
| B2 | 1.10114553 |
| B3 | 1.09441266 |
| B4 | 1.49333591 |
| B5 | 1.08545919 |
| B6 | 1.73257155 |

|     |               |
|-----|---------------|
| B7  | 1.83287366    |
| B8  | 1.09388287    |
| B9  | 1.09323468    |
| B10 | 1.52927895    |
| B11 | 1.09536572    |
| B12 | 1.09492510    |
| B13 | 1.53473135    |
| B14 | 1.09666624    |
| B15 | 1.09672862    |
| B16 | 1.53156611    |
| B17 | 1.09321828    |
| B18 | 1.09419720    |
| B19 | 1.09417456    |
| A1  | 107.05733961  |
| A2  | 107.80927635  |
| A3  | 111.50377548  |
| A4  | 120.14866064  |
| A5  | 119.45938711  |
| A6  | 101.71320892  |
| A7  | 107.74684683  |
| A8  | 104.61253389  |
| A9  | 114.38482124  |
| A10 | 109.07050443  |
| A11 | 109.08349022  |
| A12 | 112.60416440  |
| A13 | 109.32998544  |
| A14 | 109.38213880  |
| A15 | 112.85006495  |
| A16 | 111.34261075  |
| A17 | 111.14471822  |
| A18 | 111.16458092  |
| D1  | 114.66094157  |
| D2  | -123.94575147 |
| D3  | -162.45049087 |
| D4  | 38.99955256   |
| D5  | -171.86402179 |
| D6  | -52.73600745  |
| D7  | -166.66862975 |
| D8  | 71.67086750   |
| D9  | 58.39507582   |
| D10 | -57.38339994  |
| D11 | -179.47801396 |
| D12 | 58.09498634   |
| D13 | -57.73335595  |
| D14 | -179.83162624 |
| D15 | -179.81884691 |

D16 -59.71958718  
 D17 60.07941503

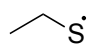

0 2

S  
 C 1 B1  
 H 2 B2 1 A1  
 H 2 B3 1 A2 3 D1  
 C 2 B4 1 A3 4 D2  
 H 5 B5 2 A4 1 D3  
 H 5 B6 2 A5 1 D4  
 H 5 B7 2 A6 1 D5

B1 1.81255108  
 B2 1.09664263  
 B3 1.09673222  
 B4 1.52576377  
 B5 1.09500828  
 B6 1.09200972  
 B7 1.09200626  
 A1 105.99738868  
 A2 105.92913178  
 A3 115.64533741  
 A4 110.46961552  
 A5 110.99351663  
 A6 110.99466025  
 D1 111.39208323  
 D2 124.26821945  
 D3 -179.90021959  
 D4 -59.84034334  
 D5 60.04987358

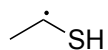

0 2

C  
 H 1 B1  
 C 1 B2 2 A1  
 H 3 B3 1 A2 2 D1  
 H 3 B4 1 A3 2 D2  
 H 3 B5 1 A4 2 D3  
 S 1 B6 3 A5 6 D4

|    |               |    |   |    |   |    |
|----|---------------|----|---|----|---|----|
| H  | 7             | B7 | 1 | A6 | 3 | D5 |
| B1 | 1.08280820    |    |   |    |   |    |
| B2 | 1.49081581    |    |   |    |   |    |
| B3 | 1.09616291    |    |   |    |   |    |
| B4 | 1.10097693    |    |   |    |   |    |
| B5 | 1.09318357    |    |   |    |   |    |
| B6 | 1.74140765    |    |   |    |   |    |
| B7 | 1.34672372    |    |   |    |   |    |
| A1 | 120.84333401  |    |   |    |   |    |
| A2 | 111.71416347  |    |   |    |   |    |
| A3 | 112.40421945  |    |   |    |   |    |
| A4 | 110.57850497  |    |   |    |   |    |
| A5 | 123.18636190  |    |   |    |   |    |
| A6 | 97.80640654   |    |   |    |   |    |
| D1 | 152.36045761  |    |   |    |   |    |
| D2 | -87.65398869  |    |   |    |   |    |
| D3 | 32.39803811   |    |   |    |   |    |
| D4 | -168.94445656 |    |   |    |   |    |
| D5 | 29.18077742   |    |   |    |   |    |

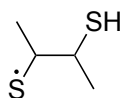

0 2

|   |    |     |   |     |   |
|---|----|-----|---|-----|---|
| C |    |     |   |     |   |
| H | 1  | B1  |   |     |   |
| C | 1  | B2  | 2 | A1  |   |
| H | 3  | B3  | 1 | A2  | 2 |
| C | 3  | B4  | 1 | A3  | 2 |
| H | 5  | B5  | 3 | A4  | 1 |
| H | 5  | B6  | 3 | A5  | 1 |
| H | 5  | B7  | 3 | A6  | 1 |
| C | 1  | B8  | 3 | A7  | 5 |
| H | 9  | B9  | 1 | A8  | 3 |
| H | 9  | B10 | 1 | A9  | 3 |
| H | 9  | B11 | 1 | A10 | 3 |
| S | 1  | B12 | 9 | A11 | 3 |
| S | 3  | B13 | 1 | A12 | 9 |
| H | 14 | B14 | 3 | A13 | 1 |

|    |            |
|----|------------|
| B1 | 1.09677273 |
| B2 | 1.54858189 |
| B3 | 1.09597259 |
| B4 | 1.52970739 |



|     |               |
|-----|---------------|
| B5  | 1.09423191    |
| B6  | 1.09035918    |
| B7  | 1.09300545    |
| B8  | 1.53855186    |
| B9  | 1.09053967    |
| B10 | 1.09490589    |
| B11 | 1.09171073    |
| B12 | 1.82344416    |
| B13 | 1.84476855    |
| B14 | 1.34594172    |
| A1  | 107.31927559  |
| A2  | 106.44912693  |
| A3  | 114.32764412  |
| A4  | 111.10594690  |
| A5  | 110.44375033  |
| A6  | 110.69352243  |
| A7  | 113.06099846  |
| A8  | 110.34720317  |
| A9  | 109.95583417  |
| A10 | 111.91983440  |
| A11 | 110.97018710  |
| A12 | 112.13525299  |
| A13 | 95.93838453   |
| D1  | -63.20774904  |
| D2  | 176.46520742  |
| D3  | 58.40099023   |
| D4  | 178.44968498  |
| D5  | -61.87893476  |
| D6  | -64.50445401  |
| D7  | -171.05791344 |
| D8  | -51.38077962  |
| D9  | 68.71945001   |
| D10 | -129.66096727 |
| D11 | 166.66358796  |
| D12 | 65.40913399   |

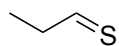

0 1

C

C

H

S

H

H

1

2

2

1

1

B1

B2

B3

B4

B5

1

1

2

2

A1

A2 3

A3 4

A4 4

D1

D2

D3

|   |   |    |   |    |   |    |
|---|---|----|---|----|---|----|
| C | 1 | B6 | 2 | A5 | 4 | D4 |
| H | 7 | B7 | 1 | A6 | 2 | D5 |
| H | 7 | B8 | 1 | A7 | 2 | D6 |
| H | 7 | B9 | 1 | A8 | 2 | D7 |

|    |               |
|----|---------------|
| B1 | 1.49928079    |
| B2 | 1.09327780    |
| B3 | 1.62101959    |
| B4 | 1.10069884    |
| B5 | 1.10021014    |
| B6 | 1.52446846    |
| B7 | 1.09248638    |
| B8 | 1.09173182    |
| B9 | 1.09173185    |
| A1 | 113.68135958  |
| A2 | 127.79107438  |
| A3 | 106.54145479  |
| A4 | 106.58648058  |
| A5 | 117.20947132  |
| A6 | 110.14116314  |
| A7 | 111.21517133  |
| A8 | 111.20612761  |
| D1 | -179.99577006 |
| D2 | -124.75872528 |
| D3 | 124.70098749  |
| D4 | -0.03955432   |
| D5 | -179.97522250 |
| D6 | -59.74443602  |
| D7 | 59.81639596   |

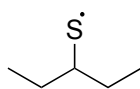

02

|   |   |     |   |    |    |
|---|---|-----|---|----|----|
| C |   |     |   |    |    |
| H | 1 | B1  |   |    |    |
| C | 1 | B2  | 2 | A1 |    |
| H | 3 | B3  | 1 | A2 | 2  |
| C | 3 | B4  | 1 | A3 | 2  |
| H | 5 | B5  | 3 | A4 | 1  |
| H | 5 | B6  | 3 | A5 | 1  |
| H | 5 | B7  | 3 | A6 | 1  |
| C | 1 | B8  | 3 | A7 | 5  |
| H | 9 | B9  | 1 | A8 | 3  |
| H | 9 | B10 | 1 | A9 | 3  |
|   |   |     |   |    | D1 |
|   |   |     |   |    | D2 |
|   |   |     |   |    | D3 |
|   |   |     |   |    | D4 |
|   |   |     |   |    | D5 |
|   |   |     |   |    | D6 |
|   |   |     |   |    | D7 |
|   |   |     |   |    | D8 |

|   |    |     |   |     |   |     |
|---|----|-----|---|-----|---|-----|
| S | 1  | B11 | 3 | A10 | 5 | D9  |
| H | 3  | B12 | 1 | A11 | 9 | D10 |
| C | 9  | B13 | 1 | A12 | 3 | D11 |
| H | 14 | B14 | 9 | A13 | 1 | D12 |
| H | 14 | B15 | 9 | A14 | 1 | D13 |
| H | 14 | B16 | 9 | A15 | 1 | D14 |

|     |               |
|-----|---------------|
| B1  | 1.10226194    |
| B2  | 1.54217874    |
| B3  | 1.09552624    |
| B4  | 1.52889342    |
| B5  | 1.09163168    |
| B6  | 1.09304953    |
| B7  | 1.09477542    |
| B8  | 1.54224361    |
| B9  | 1.09674518    |
| B10 | 1.09551741    |
| B11 | 1.82668254    |
| B12 | 1.09674743    |
| B13 | 1.52888430    |
| B14 | 1.09304450    |
| B15 | 1.09163860    |
| B16 | 1.09476921    |
| A1  | 108.20767624  |
| A2  | 108.85232020  |
| A3  | 114.86362812  |
| A4  | 111.27992299  |
| A5  | 110.67981624  |
| A6  | 111.06857592  |
| A7  | 112.57407314  |
| A8  | 107.29811433  |
| A9  | 108.85512092  |
| A10 | 112.50692856  |
| A11 | 107.29529495  |
| A12 | 114.85603881  |
| A13 | 110.68305025  |
| A14 | 111.27634677  |
| A15 | 111.06805461  |
| D1  | 172.14354925  |
| D2  | 48.29056594   |
| D3  | 60.40166687   |
| D4  | -179.36508749 |
| D5  | -59.83547941  |
| D6  | 167.82066401  |
| D7  | -46.01627889  |
| D8  | 68.48402629   |

D9 -63.82350674  
 D10 46.17294659  
 D11 -167.66547629  
 D12 179.48496133  
 D13 -60.28498595  
 D14 59.95294256

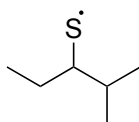

02

|   |    |     |    |     |   |
|---|----|-----|----|-----|---|
| C |    |     |    |     |   |
| H | 1  | B1  |    |     |   |
| C | 1  | B2  | 2  | A1  |   |
| H | 3  | B3  | 1  | A2  | 2 |
| C | 3  | B4  | 1  | A3  | 2 |
| H | 5  | B5  | 3  | A4  | 1 |
| H | 5  | B6  | 3  | A5  | 1 |
| H | 5  | B7  | 3  | A6  | 1 |
| C | 3  | B8  | 1  | A7  | 5 |
| H | 9  | B9  | 3  | A8  | 1 |
| H | 9  | B10 | 3  | A9  | 1 |
| H | 9  | B11 | 3  | A10 | 1 |
| C | 1  | B12 | 3  | A11 | 9 |
| H | 13 | B13 | 1  | A12 | 3 |
| H | 13 | B14 | 1  | A13 | 3 |
| S | 1  | B15 | 13 | A14 | 3 |
| C | 13 | B16 | 1  | A15 | 3 |
| H | 17 | B17 | 13 | A16 | 1 |
| H | 17 | B18 | 13 | A17 | 1 |
| H | 17 | B19 | 13 | A18 | 1 |

B1 1.10218121  
 B2 1.55164885  
 B3 1.09878610  
 B4 1.53481827  
 B5 1.09272600  
 B6 1.09322452  
 B7 1.09457122  
 B8 1.53281678  
 B9 1.09353216  
 B10 1.09448215  
 B11 1.09261846  
 B12 1.54430571

|     |               |
|-----|---------------|
| B13 | 1.09705083    |
| B14 | 1.09409901    |
| B15 | 1.82654627    |
| B16 | 1.52928524    |
| B17 | 1.09307241    |
| B18 | 1.09186766    |
| B19 | 1.09478297    |
| A1  | 107.11280705  |
| A2  | 104.98723958  |
| A3  | 112.77395546  |
| A4  | 112.14274269  |
| A5  | 110.48388539  |
| A6  | 110.62193320  |
| A7  | 112.31484727  |
| A8  | 110.46700015  |
| A9  | 111.39030076  |
| A10 | 111.07247889  |
| A11 | 113.64817250  |
| A12 | 107.40049987  |
| A13 | 109.52119042  |
| A14 | 112.15990143  |
| A15 | 114.27562245  |
| A16 | 110.76292126  |
| A17 | 111.15104488  |
| A18 | 111.09372904  |
| D1  | -68.49293314  |
| D2  | 174.45997734  |
| D3  | 56.57979906   |
| D4  | 176.60450367  |
| D5  | -64.25409284  |
| D6  | -126.48145578 |
| D7  | -174.61120801 |
| D8  | -54.88378676  |
| D9  | 65.47656012   |
| D10 | 166.52714930  |
| D11 | -40.15018530  |
| D12 | 74.87691404   |
| D13 | -130.90137495 |
| D14 | -161.58944563 |
| D15 | -179.96626754 |
| D16 | -59.81929570  |
| D17 | 60.39724379   |

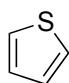

|     |   |    |   |    |   |
|-----|---|----|---|----|---|
| 0 1 |   |    |   |    |   |
| C   |   |    |   |    |   |
| C   | 1 | B1 |   |    |   |
| C   | 2 | B2 | 1 | A1 |   |
| C   | 3 | B3 | 2 | A2 | 1 |
| S   | 4 | B4 | 3 | A3 | 2 |
| H   | 1 | B5 | 2 | A4 | 3 |
| H   | 2 | B6 | 1 | A5 | 5 |
| H   | 3 | B7 | 2 | A6 | 1 |
| H   | 4 | B8 | 3 | A7 | 2 |

|    |              |
|----|--------------|
| B1 | 1.36629669   |
| B2 | 1.42594200   |
| B3 | 1.36629669   |
| B4 | 1.72748369   |
| B5 | 1.07892407   |
| B6 | 1.08214933   |
| B7 | 1.08214933   |
| B8 | 1.07892407   |
| A1 | 112.67431284 |
| A2 | 112.67431284 |
| A3 | 111.46777715 |
| A4 | 128.49773050 |
| A5 | 123.34875370 |
| A6 | 123.97693347 |
| A7 | 128.49773050 |
| D1 | 0.00000000   |
| D2 | 0.00000000   |
| D3 | 180.00000000 |
| D4 | 180.00000000 |
| D5 | 180.00000000 |
| D6 | 180.00000000 |

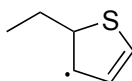

|     |   |    |   |    |   |
|-----|---|----|---|----|---|
| 0 1 |   |    |   |    |   |
| C   |   |    |   |    |   |
| C   | 1 | B1 |   |    |   |
| C   | 2 | B2 | 1 | A1 |   |
| C   | 3 | B3 | 2 | A2 | 1 |
| S   | 1 | B4 | 2 | A3 | 3 |
| H   | 1 | B5 | 2 | A4 | 3 |
| H   | 2 | B6 | 1 | A5 | 5 |

|   |    |     |   |     |   |     |
|---|----|-----|---|-----|---|-----|
| H | 3  | B7  | 2 | A6  | 1 | D5  |
| C | 4  | B8  | 3 | A7  | 2 | D6  |
| H | 9  | B9  | 4 | A8  | 3 | D7  |
| C | 9  | B10 | 4 | A9  | 3 | D8  |
| H | 11 | B11 | 9 | A10 | 4 | D9  |
| H | 11 | B12 | 9 | A11 | 4 | D10 |

|     |               |
|-----|---------------|
| B1  | 1.36611175    |
| B2  | 1.42064110    |
| B3  | 1.37673881    |
| B4  | 1.72772356    |
| B5  | 1.07914062    |
| B6  | 1.08196907    |
| B7  | 1.08285374    |
| B8  | 1.45312921    |
| B9  | 1.08780089    |
| B10 | 1.33683036    |
| B11 | 1.08488250    |
| B12 | 1.08259189    |
| A1  | 112.50224180  |
| A2  | 113.80240053  |
| A3  | 111.74423143  |
| A4  | 128.55273164  |
| A5  | 123.43563801  |
| A6  | 123.89791971  |
| A7  | 126.46042820  |
| A8  | 113.71410171  |
| A9  | 127.60039470  |
| A10 | 122.38504238  |
| A11 | 120.93505612  |
| D1  | -0.05400000   |
| D2  | 0.04834947    |
| D3  | -179.97564693 |
| D4  | -179.98496173 |
| D5  | 179.97475778  |
| D6  | -179.97991581 |
| D7  | 0.02090095    |
| D8  | -179.96636468 |
| D9  | -0.00489227   |
| D10 | 179.98866291  |

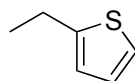

0 1

|   |    |     |   |     |   |
|---|----|-----|---|-----|---|
| C |    |     |   |     |   |
| C | 1  | B1  |   |     |   |
| C | 2  | B2  | 1 | A1  |   |
| S | 3  | B3  | 2 | A2  | 1 |
| H | 1  | B4  | 2 | A3  | 3 |
| H | 2  | B5  | 1 | A4  | 3 |
| H | 3  | B6  | 2 | A5  | 1 |
| C | 1  | B7  | 2 | A6  | 3 |
| C | 8  | B8  | 1 | A7  | 2 |
| H | 9  | B9  | 8 | A8  | 1 |
| H | 9  | B10 | 8 | A9  | 1 |
| C | 9  | B11 | 8 | A10 | 1 |
| H | 12 | B12 | 9 | A11 | 8 |
| H | 12 | B13 | 9 | A12 | 8 |
| H | 12 | B14 | 9 | A13 | 8 |

|     |               |
|-----|---------------|
| B1  | 1.42578418    |
| B2  | 1.36439442    |
| B3  | 1.72934976    |
| B4  | 1.08324227    |
| B5  | 1.08225864    |
| B6  | 1.07896647    |
| B7  | 1.36921688    |
| B8  | 1.50344873    |
| B9  | 1.09438600    |
| B10 | 1.09530725    |
| B11 | 1.53869801    |
| B12 | 1.09356317    |
| B13 | 1.09283609    |
| B14 | 1.09270691    |
| A1  | 112.65670388  |
| A2  | 111.26732211  |
| A3  | 123.70549689  |
| A4  | 123.95416912  |
| A5  | 128.73620126  |
| A6  | 113.78736625  |
| A7  | 128.32269395  |
| A8  | 107.62052970  |
| A9  | 109.99125910  |
| A10 | 114.02454302  |
| A11 | 110.66345777  |
| A12 | 111.23090810  |
| A13 | 110.77476270  |
| D1  | 0.01527461    |
| D2  | -179.76812783 |
| D3  | 179.79027523  |



|     |               |
|-----|---------------|
| D4  | 179.70276208  |
| D5  | 0.01872080    |
| D6  | 178.51084444  |
| D7  | 17.68515127   |
| D8  | 132.94238701  |
| D9  | -103.87392431 |
| D10 | 178.33771372  |
| D11 | -61.63106025  |
| D12 | 58.19018500   |

### S4.1 Transition State Geometries

*TS 1 and 2 are provided in Kida et al. (2014)*

TS 3

0 1

|   |    |     |   |     |   |     |
|---|----|-----|---|-----|---|-----|
| O |    |     |   |     |   |     |
| H | 1  | B1  |   |     |   |     |
| H | 1  | B2  | 2 | A1  |   |     |
| H | 1  | B3  | 2 | A2  | 3 | D1  |
| S | 1  | B4  | 4 | A3  | 2 | D2  |
| O | 1  | B5  | 5 | A4  | 2 | D3  |
| H | 6  | B6  | 1 | A5  | 5 | D4  |
| C | 6  | B7  | 1 | A6  | 5 | D5  |
| H | 8  | B8  | 6 | A7  | 1 | D6  |
| C | 8  | B9  | 6 | A8  | 1 | D7  |
| H | 10 | B10 | 8 | A9  | 6 | D8  |
| H | 10 | B11 | 8 | A10 | 6 | D9  |
| H | 10 | B12 | 8 | A11 | 6 | D10 |

|     |              |
|-----|--------------|
| B1  | 1.06952307   |
| B2  | 1.22402479   |
| B3  | 0.96583957   |
| B4  | 2.87320980   |
| B5  | 2.39424898   |
| B6  | 0.97151059   |
| B7  | 1.56861481   |
| B8  | 1.09135899   |
| B9  | 1.51406502   |
| B10 | 1.09380187   |
| B11 | 1.09131350   |
| B12 | 1.09300096   |
| A1  | 91.13577836  |
| A2  | 107.96358827 |
| A3  | 115.08383529 |

|     |               |
|-----|---------------|
| A4  | 62.22656177   |
| A5  | 102.27360986  |
| A6  | 94.79898146   |
| A7  | 99.32302920   |
| A8  | 106.09445059  |
| A9  | 111.23288028  |
| A10 | 108.86228927  |
| A11 | 110.65211601  |
| D1  | -115.17820997 |
| D2  | -20.35986833  |
| D3  | -178.00133616 |
| D4  | 79.67672631   |
| D5  | -26.50267574  |
| D6  | -76.23651761  |
| D7  | 168.73864254  |
| D8  | 52.18571138   |
| D9  | 172.11796185  |
| D10 | -70.02134605  |

TS 4

0 1

|   |   |     |   |     |   |     |
|---|---|-----|---|-----|---|-----|
| C |   |     |   |     |   |     |
| H | 1 | B1  |   |     |   |     |
| C | 1 | B2  | 2 | A1  |   |     |
| H | 3 | B3  | 1 | A2  | 2 | D1  |
| H | 3 | B4  | 1 | A3  | 2 | D2  |
| H | 3 | B5  | 1 | A4  | 2 | D3  |
| S | 1 | B6  | 3 | A5  | 4 | D4  |
| H | 7 | B7  | 1 | A6  | 3 | D5  |
| O | 1 | B8  | 3 | A7  | 7 | D6  |
| H | 9 | B9  | 1 | A8  | 3 | D7  |
| H | 7 | B10 | 1 | A9  | 9 | D8  |
| H | 9 | B11 | 1 | A10 | 3 | D9  |
| S | 9 | B12 | 1 | A11 | 3 | D10 |

|    |            |
|----|------------|
| B1 | 1.08970255 |
| B2 | 1.50041074 |
| B3 | 1.08939419 |
| B4 | 1.09029759 |
| B5 | 1.09718249 |
| B6 | 2.46557561 |
| B7 | 1.34468484 |
| B8 | 1.27487254 |
| B9 | 1.13118901 |

|     |               |
|-----|---------------|
| B10 | 1.48947314    |
| B11 | 3.40733892    |
| B12 | 2.84384951    |
| A1  | 117.25337503  |
| A2  | 111.66777376  |
| A3  | 111.68528896  |
| A4  | 106.82973355  |
| A5  | 97.50660323   |
| A6  | 92.73197867   |
| A7  | 121.55246590  |
| A8  | 112.88729008  |
| A9  | 79.43731314   |
| A10 | 94.12803678   |
| A11 | 108.38953781  |
| D1  | 38.72673208   |
| D2  | 162.68957719  |
| D3  | -80.02410659  |
| D4  | -58.25202237  |
| D5  | -178.23359591 |
| D6  | -111.60040503 |
| D7  | 50.14785862   |
| D8  | 38.93279910   |
| D9  | 45.53058497   |
| D10 | 63.50347879   |

TS 5

0 1

|   |   |     |   |     |   |     |
|---|---|-----|---|-----|---|-----|
| H |   |     |   |     |   |     |
| H | 1 | B1  |   |     |   |     |
| H | 1 | B2  | 2 | A1  |   |     |
| S | 1 | B3  | 2 | A2  | 3 | D1  |
| O | 4 | B4  | 1 | A3  | 2 | D2  |
| H | 5 | B5  | 4 | A4  | 1 | D3  |
| C | 5 | B6  | 4 | A5  | 1 | D4  |
| H | 7 | B7  | 5 | A6  | 4 | D5  |
| C | 7 | B8  | 5 | A7  | 4 | D6  |
| H | 9 | B9  | 7 | A8  | 5 | D7  |
| H | 9 | B10 | 7 | A9  | 5 | D8  |
| H | 9 | B11 | 7 | A10 | 5 | D9  |
| S | 5 | B12 | 4 | A11 | 1 | D10 |

|    |            |
|----|------------|
| B1 | 2.05725442 |
| B2 | 2.19054211 |
| B3 | 1.71556455 |

|     |               |
|-----|---------------|
| B4  | 2.76969204    |
| B5  | 0.97396507    |
| B6  | 1.64700051    |
| B7  | 1.08938587    |
| B8  | 1.50811532    |
| B9  | 1.09244592    |
| B10 | 1.09227723    |
| B11 | 1.09181046    |
| B12 | 2.94203736    |
| A1  | 71.06737555   |
| A2  | 97.35576949   |
| A3  | 67.67516320   |
| A4  | 79.57028984   |
| A5  | 37.01955387   |
| A6  | 96.85530280   |
| A7  | 104.58134181  |
| A8  | 111.09883852  |
| A9  | 108.29857615  |
| A10 | 111.20559006  |
| A11 | 70.24551157   |
| D1  | -141.68526919 |
| D2  | 0.36492204    |
| D3  | -106.76726622 |
| D4  | 121.70178930  |
| D5  | -118.15448332 |
| D6  | 126.54762855  |
| D7  | 51.20802580   |
| D8  | 170.48531821  |
| D9  | -71.44873318  |
| D10 | -0.99833723   |

TS 6

0 2

|   |    |     |   |    |   |    |
|---|----|-----|---|----|---|----|
| C |    |     |   |    |   |    |
| H | 1  | B1  |   |    |   |    |
| H | 1  | B2  | 2 | A1 |   |    |
| H | 1  | B3  | 3 | A2 | 2 | D1 |
| C | 1  | B4  | 3 | A3 | 2 | D2 |
| H | 5  | B5  | 1 | A4 | 3 | D3 |
| H | 5  | B6  | 1 | A5 | 3 | D4 |
| C | 5  | B7  | 1 | A6 | 3 | D5 |
| H | 8  | B8  | 5 | A7 | 1 | D6 |
| C | 8  | B9  | 5 | A8 | 1 | D7 |
| H | 10 | B10 | 8 | A9 | 5 | D8 |

|   |    |     |    |     |    |     |
|---|----|-----|----|-----|----|-----|
| H | 10 | B11 | 8  | A10 | 5  | D9  |
| C | 10 | B12 | 8  | A11 | 5  | D10 |
| H | 13 | B13 | 10 | A12 | 8  | D11 |
| H | 13 | B14 | 10 | A13 | 8  | D12 |
| C | 13 | B15 | 10 | A14 | 8  | D13 |
| H | 16 | B16 | 13 | A15 | 10 | D14 |
| S | 16 | B17 | 13 | A16 | 10 | D15 |

|     |               |
|-----|---------------|
| B1  | 1.09421621    |
| B2  | 1.09221317    |
| B3  | 1.09291044    |
| B4  | 1.53110961    |
| B5  | 1.09763940    |
| B6  | 1.10397803    |
| B7  | 1.49446825    |
| B8  | 1.08450417    |
| B9  | 1.48657800    |
| B10 | 1.09260693    |
| B11 | 1.09817493    |
| B12 | 1.58045077    |
| B13 | 1.09353486    |
| B14 | 1.09479214    |
| B15 | 1.48691749    |
| B16 | 1.08887009    |
| B17 | 1.63777277    |
| A1  | 107.97265689  |
| A2  | 108.16009505  |
| A3  | 110.70140393  |
| A4  | 109.75360643  |
| A5  | 109.02358494  |
| A6  | 114.07839275  |
| A7  | 117.46949565  |
| A8  | 121.26339089  |
| A9  | 110.62647261  |
| A10 | 110.37626078  |
| A11 | 113.95954997  |
| A12 | 109.69691929  |
| A13 | 107.73234650  |
| A14 | 108.59120913  |
| A15 | 118.98435067  |
| A16 | 120.23454095  |
| D1  | -116.33591318 |
| D2  | 121.69116766  |
| D3  | 61.56429219   |
| D4  | 176.20480896  |
| D5  | -62.14601144  |

D6 -28.33021231  
 D7 171.54037671  
 D8 161.12263718  
 D9 42.53945293  
 D10 -76.69114233  
 D11 -179.55659411  
 D12 63.10504633  
 D13 -56.66263629  
 D14 -114.27082759  
 D15 57.18413023

TS 7

0 2

|   |    |     |    |     |    |
|---|----|-----|----|-----|----|
| C |    |     |    |     |    |
| H | 1  | B1  |    |     |    |
| H | 1  | B2  | 2  | A1  |    |
| H | 1  | B3  | 3  | A2  | 2  |
| C | 1  | B4  | 3  | A3  | 2  |
| H | 5  | B5  | 1  | A4  | 3  |
| H | 5  | B6  | 1  | A5  | 3  |
| C | 5  | B7  | 1  | A6  | 3  |
| H | 8  | B8  | 5  | A7  | 1  |
| C | 8  | B9  | 5  | A8  | 1  |
| H | 10 | B10 | 8  | A9  | 5  |
| C | 10 | B11 | 8  | A10 | 5  |
| H | 12 | B12 | 10 | A11 | 8  |
| C | 12 | B13 | 10 | A12 | 8  |
| H | 14 | B14 | 12 | A13 | 10 |
| S | 14 | B15 | 12 | A14 | 10 |

B1 1.09356940  
 B2 1.09297820  
 B3 1.09324724  
 B4 1.54019775  
 B5 1.09365505  
 B6 1.09356292  
 B7 1.50754370  
 B8 1.08769500  
 B9 1.40911010  
 B10 1.08764618  
 B11 1.40285647  
 B12 1.08442076  
 B13 1.38382399  
 B14 1.08460362

|     |               |
|-----|---------------|
| B15 | 1.71190225    |
| A1  | 107.79023255  |
| A2  | 107.98846932  |
| A3  | 111.35837338  |
| A4  | 110.13452207  |
| A5  | 108.99804449  |
| A6  | 112.11429071  |
| A7  | 114.09889451  |
| A8  | 122.34290221  |
| A9  | 120.24744832  |
| A10 | 118.37026802  |
| A11 | 122.19038962  |
| A12 | 116.85809539  |
| A13 | 121.60069215  |
| A14 | 120.79559134  |
| D1  | -116.33040599 |
| D2  | 122.09807742  |
| D3  | 60.97572459   |
| D4  | 177.71061351  |
| D5  | -61.55309639  |
| D6  | -61.22986216  |
| D7  | 87.36788944   |
| D8  | -13.25143569  |
| D9  | 154.65665621  |
| D10 | 169.05476978  |
| D11 | -20.07596919  |
| D12 | -175.28685070 |
| D13 | 0.88578625    |

TS 8

02

|   |    |     |   |     |     |
|---|----|-----|---|-----|-----|
| C |    |     |   |     |     |
| C | 1  | B1  |   |     |     |
| H | 2  | B2  | 1 | A1  |     |
| C | 2  | B3  | 1 | A2  | 3   |
| H | 4  | B4  | 2 | A3  | 1   |
| C | 4  | B5  | 2 | A4  | 1   |
| S | 6  | B6  | 4 | A5  | 2   |
| C | 1  | B7  | 2 | A6  | 4   |
| H | 8  | B8  | 1 | A7  | 2   |
| H | 8  | B9  | 1 | A8  | 2   |
| C | 8  | B10 | 1 | A9  | 2   |
| H | 11 | B11 | 8 | A10 | 1   |
| H | 11 | B12 | 8 | A11 | 1   |
|   |    |     |   |     | D1  |
|   |    |     |   |     | D2  |
|   |    |     |   |     | D3  |
|   |    |     |   |     | D4  |
|   |    |     |   |     | D5  |
|   |    |     |   |     | D6  |
|   |    |     |   |     | D7  |
|   |    |     |   |     | D8  |
|   |    |     |   |     | D9  |
|   |    |     |   |     | D10 |

H 11 B13 8 A12 1 D11

|     |               |
|-----|---------------|
| B1  | 1.31753116    |
| B2  | 1.09087804    |
| B3  | 1.48363743    |
| B4  | 1.07906737    |
| B5  | 1.32369155    |
| B6  | 1.58057883    |
| B7  | 1.46698889    |
| B8  | 1.09610558    |
| B9  | 1.09610472    |
| B10 | 1.54633067    |
| B11 | 1.09269808    |
| B12 | 1.09210292    |
| B13 | 1.09210247    |
| A1  | 119.26391461  |
| A2  | 124.32526296  |
| A3  | 121.54370792  |
| A4  | 110.88645855  |
| A5  | 140.32732762  |
| A6  | 145.60831344  |
| A7  | 109.69007715  |
| A8  | 109.69043672  |
| A9  | 112.50545531  |
| A10 | 109.81239772  |
| A11 | 110.96397649  |
| A12 | 110.96424674  |
| D1  | 180.00000000  |
| D2  | -180.00000000 |
| D3  | 0.00000000    |
| D4  | -0.00000000   |
| D5  | -179.99486689 |
| D6  | 121.76042525  |
| D7  | -121.81127277 |
| D8  | -0.02523913   |
| D9  | 180.00000000  |
| D10 | -60.31786829  |
| D11 | 60.31772054   |

TS S1

0 2

|   |             |             |             |
|---|-------------|-------------|-------------|
| C | -2.70125100 | -1.07993300 | -0.14270700 |
| H | -2.66773300 | -1.06543300 | -1.23700900 |
| H | -3.68033300 | -0.67506400 | 0.15268900  |



|   |             |             |             |
|---|-------------|-------------|-------------|
| H | -2.67437600 | -2.12394000 | 0.18168500  |
| C | -1.56840400 | -0.28482300 | 0.45280900  |
| H | -1.45215100 | -0.41761300 | 1.53151100  |
| H | -0.30136800 | -0.67983400 | -0.00793900 |
| C | -1.33315200 | 1.14848000  | -0.00757700 |
| H | -1.85005300 | 1.89202900  | 0.60867800  |
| H | -1.70478200 | 1.26852400  | -1.03199400 |
| C | 0.20202100  | 1.35086400  | 0.01434700  |
| H | 0.53482500  | 1.52783800  | 1.04285200  |
| H | 0.53326400  | 2.20517700  | -0.58278900 |
| C | 0.76240400  | 0.01933800  | -0.47677300 |
| H | 0.69627800  | -0.12045500 | -1.55734800 |
| S | 2.38541300  | -0.52624200 | 0.03171700  |
| H | 2.23011200  | -0.31491800 | 1.35159700  |

TS S2

0 2

|   |             |             |             |
|---|-------------|-------------|-------------|
| S | 2.42622400  | -0.63513000 | -0.06407900 |
| H | 2.03157000  | -0.79863200 | -1.33992600 |
| C | 0.96584300  | 0.23932700  | 0.51410900  |
| H | -0.14939200 | -0.49946200 | 0.50488700  |
| H | 1.11154800  | 0.41878600  | 1.58130900  |
| C | 0.50491400  | 1.47421500  | -0.24623400 |
| H | 0.60570800  | 1.29797000  | -1.32394900 |
| H | 1.14355400  | 2.33489300  | -0.01359400 |
| C | -0.96882700 | 1.79298500  | 0.06844000  |
| H | -1.27299400 | 2.69221600  | -0.47570900 |
| H | -1.07654000 | 2.02275900  | 1.13591700  |
| C | -1.89011400 | 0.61424100  | -0.30054800 |
| H | -1.81021900 | 0.42834600  | -1.37962500 |
| H | -2.93751400 | 0.89194900  | -0.11607500 |
| C | -1.52482700 | -0.65027900 | 0.45710800  |
| H | -1.77339000 | -0.59158900 | 1.52026200  |
| C | -1.87928900 | -1.97815300 | -0.16887800 |
| H | -1.46249900 | -2.07007300 | -1.17724500 |
| H | -1.50726000 | -2.81671400 | 0.42562900  |
| H | -2.96835900 | -2.10239600 | -0.26059000 |

TS S3

0 2

|   |   |    |
|---|---|----|
| C |   |    |
| H | 1 | B1 |

|   |    |     |    |     |   |
|---|----|-----|----|-----|---|
| H | 1  | B2  | 2  | A1  |   |
| H | 1  | B3  | 3  | A2  | 2 |
| C | 1  | B4  | 3  | A3  | 4 |
| H | 5  | B5  | 1  | A4  | 3 |
| H | 5  | B6  | 1  | A5  | 3 |
| S | 5  | B7  | 1  | A6  | 3 |
| C | 8  | B8  | 5  | A7  | 1 |
| H | 9  | B9  | 8  | A8  | 5 |
| H | 9  | B10 | 8  | A9  | 5 |
| C | 9  | B11 | 8  | A10 | 5 |
| H | 12 | B12 | 9  | A11 | 8 |
| C | 12 | B13 | 9  | A12 | 8 |
| H | 14 | B14 | 12 | A13 | 9 |
| H | 14 | B15 | 12 | A14 | 9 |
| H | 14 | B16 | 12 | A15 | 9 |

|     |              |
|-----|--------------|
| B1  | 1.09480882   |
| B2  | 1.09258500   |
| B3  | 1.09725717   |
| B4  | 1.50734084   |
| B5  | 1.09170650   |
| B6  | 1.36524488   |
| B7  | 1.80529783   |
| B8  | 1.86799990   |
| B9  | 1.09271626   |
| B10 | 1.09184974   |
| B11 | 1.51465292   |
| B12 | 1.09163965   |
| B13 | 1.50866059   |
| B14 | 1.09450653   |
| B15 | 1.09363370   |
| B16 | 1.09878829   |
| A1  | 108.74419826 |
| A2  | 107.41838456 |
| A3  | 111.23972185 |
| A4  | 114.48423616 |
| A5  | 112.46673398 |
| A6  | 117.08307974 |
| A7  | 93.21780891  |
| A8  | 108.97506695 |
| A9  | 107.16252592 |
| A10 | 107.11119200 |
| A11 | 113.25632370 |
| A12 | 118.36462180 |
| A13 | 111.40783730 |
| A14 | 111.34075730 |

|     |               |
|-----|---------------|
| A15 | 111.55534014  |
| D1  | -115.62166842 |
| D2  | -122.46664137 |
| D3  | -170.92287004 |
| D4  | -53.83526629  |
| D5  | 52.88500053   |
| D6  | -137.05902963 |
| D7  | -90.23024721  |
| D8  | 152.55890000  |
| D9  | 29.89816647   |
| D10 | 78.88891488   |
| D11 | -143.14446036 |
| D12 | 51.97146622   |
| D13 | 172.77056541  |
| D14 | -67.62619677  |

TS S4

02

|   |    |     |    |     |   |     |
|---|----|-----|----|-----|---|-----|
| C |    |     |    |     |   |     |
| H | 1  | B1  |    |     |   |     |
| C | 1  | B2  | 2  | A1  |   |     |
| H | 3  | B3  | 1  | A2  | 2 | D1  |
| H | 3  | B4  | 1  | A3  | 2 | D2  |
| C | 3  | B5  | 1  | A4  | 2 | D3  |
| H | 6  | B6  | 3  | A5  | 1 | D4  |
| H | 6  | B7  | 3  | A6  | 1 | D5  |
| S | 6  | B8  | 3  | A7  | 1 | D6  |
| C | 9  | B9  | 6  | A8  | 3 | D7  |
| H | 10 | B10 | 9  | A9  | 6 | D8  |
| C | 10 | B11 | 9  | A10 | 6 | D9  |
| H | 12 | B12 | 10 | A11 | 9 | D10 |
| H | 12 | B13 | 10 | A12 | 9 | D11 |
| H | 12 | B14 | 10 | A13 | 9 | D12 |
| C | 1  | B15 | 3  | A14 | 6 | D13 |
| H | 16 | B16 | 1  | A15 | 3 | D14 |
| H | 16 | B17 | 1  | A16 | 3 | D15 |
| H | 16 | B18 | 1  | A17 | 3 | D16 |
| H | 1  | B19 | 16 | A18 | 3 | D17 |

|    |            |
|----|------------|
| B1 | 1.37640224 |
| B2 | 1.51995145 |
| B3 | 1.09314315 |
| B4 | 1.10188181 |
| B5 | 1.54010394 |

|     |               |
|-----|---------------|
| B6  | 1.09329063    |
| B7  | 1.09169413    |
| B8  | 1.83478723    |
| B9  | 1.79946944    |
| B10 | 1.09246129    |
| B11 | 1.51201229    |
| B12 | 1.09694401    |
| B13 | 1.09417672    |
| B14 | 1.09304587    |
| B15 | 1.51335158    |
| B16 | 1.09353662    |
| B17 | 1.09494075    |
| B18 | 1.09879067    |
| B19 | 1.09073815    |
| A1  | 100.20559402  |
| A2  | 110.11799599  |
| A3  | 110.17302488  |
| A4  | 113.35224352  |
| A5  | 111.42014628  |
| A6  | 110.91499689  |
| A7  | 112.37101362  |
| A8  | 98.57117340   |
| A9  | 112.15946625  |
| A10 | 114.81280688  |
| A11 | 111.99599206  |
| A12 | 110.32117331  |
| A13 | 111.21556643  |
| A14 | 117.10737248  |
| A15 | 111.52286423  |
| A16 | 111.96317160  |
| A17 | 111.33472958  |
| A18 | 113.34110848  |
| D1  | 86.33645864   |
| D2  | -156.11278372 |
| D3  | -35.18024324  |
| D4  | -59.36597607  |
| D5  | -179.10109788 |
| D6  | 63.51325980   |
| D7  | -58.18113861  |
| D8  | -77.03809232  |
| D9  | 150.82070880  |
| D10 | 62.92416181   |
| D11 | -177.70819706 |
| D12 | -57.38166683  |
| D13 | 79.44331404   |
| D14 | -174.17418690 |

D15 -53.61503362  
 D16 66.02096246  
 D17 -135.34582015

TS S5

0 2

C  
 H 1 B1  
 S 1 B2 2 A1  
 C 1 B3 3 A2 2 D1  
 H 4 B4 1 A3 3 D2  
 H 4 B5 1 A4 3 D3  
 H 4 B6 1 A5 3 D4  
 H 1 B7 4 A6 3 D5

B1 1.09213187  
 B2 1.63134588  
 B3 1.49667803  
 B4 1.09424365  
 B5 1.09785510  
 B6 1.08936835  
 B7 2.22188373  
 A1 118.64372571  
 A2 125.83813399  
 A3 111.06196313  
 A4 108.51916885  
 A5 111.66246739  
 A6 98.13913227  
 D1 172.64770700  
 D2 136.99549110  
 D3 -106.20802067  
 D4 13.70759353  
 D5 -106.72242832

TS S6

0 2

C  
 H 1 B1  
 S 1 B2 2 A1  
 C 1 B3 3 A2 2 D1  
 H 4 B4 1 A3 3 D2  
 H 4 B5 1 A4 3 D3

|   |    |     |   |     |   |     |
|---|----|-----|---|-----|---|-----|
| H | 4  | B6  | 1 | A5  | 3 | D4  |
| C | 1  | B7  | 4 | A6  | 3 | D5  |
| H | 8  | B8  | 1 | A7  | 4 | D6  |
| C | 8  | B9  | 1 | A8  | 4 | D7  |
| H | 10 | B10 | 8 | A9  | 1 | D8  |
| H | 10 | B11 | 8 | A10 | 1 | D9  |
| H | 10 | B12 | 8 | A11 | 1 | D10 |
| S | 8  | B13 | 1 | A12 | 4 | D11 |
| H | 14 | B14 | 8 | A13 | 1 | D12 |

|     |               |
|-----|---------------|
| B1  | 1.08991844    |
| B2  | 1.66145433    |
| B3  | 1.50403259    |
| B4  | 1.09280597    |
| B5  | 1.09684199    |
| B6  | 1.09116748    |
| B7  | 2.38748706    |
| B8  | 1.08496370    |
| B9  | 1.49652974    |
| B10 | 1.09056277    |
| B11 | 1.09423053    |
| B12 | 1.09758557    |
| B13 | 1.74805416    |
| B14 | 1.34599000    |
| A1  | 118.13573458  |
| A2  | 122.95673831  |
| A3  | 112.13949620  |
| A4  | 108.35316317  |
| A5  | 111.26246996  |
| A6  | 99.44720200   |
| A7  | 89.76840188   |
| A8  | 105.30927727  |
| A9  | 110.33590774  |
| A10 | 111.61894636  |
| A11 | 110.60860326  |
| A12 | 108.14287347  |
| A13 | 97.50673530   |
| D1  | 157.18493831  |
| D2  | 157.63604353  |
| D3  | -84.39213120  |
| D4  | 33.55340283   |
| D5  | -113.82146489 |
| D6  | 54.92520640   |
| D7  | 173.62806202  |
| D8  | -50.55543467  |
| D9  | 69.50026006   |

D10 -170.66857985  
 D11 -56.76313587  
 D12 -90.00929782

TS S7

02

|   |    |     |   |     |   |     |   |
|---|----|-----|---|-----|---|-----|---|
| C |    |     |   |     |   |     |   |
| H | 1  | B1  |   |     |   |     |   |
| H | 1  | B2  | 2 | A1  |   |     |   |
| C | 1  | B3  | 3 | A2  | 2 | D1  | 0 |
| H | 4  | B4  | 1 | A3  | 3 | D2  | 0 |
| S | 4  | B5  | 1 | A4  | 3 | D3  | 0 |
| C | 4  | B6  | 1 | A5  | 6 | D4  | 0 |
| H | 7  | B7  | 4 | A6  | 1 | D5  | 0 |
| H | 7  | B8  | 4 | A7  | 1 | D6  | 0 |
| C | 7  | B9  | 4 | A8  | 1 | D7  | 0 |
| H | 10 | B10 | 7 | A9  | 4 | D8  | 0 |
| H | 10 | B11 | 7 | A10 | 4 | D9  | 0 |
| H | 10 | B12 | 7 | A11 | 4 | D10 | 0 |
| C | 1  | B13 | 4 | A12 | 6 | D11 | 0 |
| H | 14 | B14 | 1 | A13 | 4 | D12 | 0 |
| H | 14 | B15 | 1 | A14 | 4 | D13 | 0 |
| H | 14 | B16 | 1 | A15 | 4 | D14 | 0 |

|     |           |
|-----|-----------|
| B1  | 1.09502   |
| B2  | 1.09223   |
| B3  | 1.50616   |
| B4  | 1.09144   |
| B5  | 1.64545   |
| B6  | 2.5289    |
| B7  | 1.08461   |
| B8  | 1.08369   |
| B9  | 1.48587   |
| B10 | 1.09297   |
| B11 | 1.09295   |
| B12 | 1.10146   |
| B13 | 1.54241   |
| B14 | 1.09296   |
| B15 | 1.09186   |
| B16 | 1.09365   |
| A1  | 108.24215 |
| A2  | 109.39868 |
| A3  | 115.235   |
| A4  | 124.2771  |

|     |            |
|-----|------------|
| A5  | 97.31934   |
| A6  | 92.88555   |
| A7  | 91.48118   |
| A8  | 107.03109  |
| A9  | 112.08981  |
| A10 | 111.49719  |
| A11 | 110.64999  |
| A12 | 110.79459  |
| A13 | 110.19314  |
| A14 | 110.58347  |
| A15 | 111.3769   |
| D1  | -119.70921 |
| D2  | 164.92756  |
| D3  | -31.32699  |
| D4  | 113.01704  |
| D5  | 62.03939   |
| D6  | -54.2583   |
| D7  | -175.66352 |
| D8  | -65.65774  |
| D9  | 56.05852   |
| D10 | 175.00347  |
| D11 | 89.69113   |
| D12 | 178.05733  |
| D13 | -62.02162  |
| D14 | 58.27573   |

TS S8

0 2

|   |    |     |   |     |   |     |
|---|----|-----|---|-----|---|-----|
| C |    |     |   |     |   |     |
| H | 1  | B1  |   |     |   |     |
| H | 1  | B2  | 2 | A1  |   |     |
| C | 1  | B3  | 3 | A2  | 2 | D1  |
| H | 4  | B4  | 1 | A3  | 3 | D2  |
| S | 4  | B5  | 1 | A4  | 3 | D3  |
| C | 4  | B6  | 1 | A5  | 6 | D4  |
| H | 7  | B7  | 4 | A6  | 1 | D5  |
| C | 7  | B8  | 4 | A7  | 1 | D6  |
| H | 9  | B9  | 7 | A8  | 4 | D7  |
| H | 9  | B10 | 7 | A9  | 4 | D8  |
| H | 9  | B11 | 7 | A10 | 4 | D9  |
| C | 1  | B12 | 4 | A11 | 6 | D10 |
| H | 13 | B13 | 1 | A12 | 4 | D11 |
| H | 13 | B14 | 1 | A13 | 4 | D12 |
| H | 13 | B15 | 1 | A14 | 4 | D13 |



|   |    |     |   |     |   |     |
|---|----|-----|---|-----|---|-----|
| C | 7  | B16 | 4 | A15 | 1 | D14 |
| H | 17 | B17 | 7 | A16 | 4 | D15 |
| H | 17 | B18 | 7 | A17 | 4 | D16 |
| H | 17 | B19 | 7 | A18 | 4 | D17 |

|     |               |
|-----|---------------|
| B1  | 1.09551170    |
| B2  | 1.09237667    |
| B3  | 1.50694639    |
| B4  | 1.09089360    |
| B5  | 1.64897012    |
| B6  | 2.50820993    |
| B7  | 1.08648269    |
| B8  | 1.49077993    |
| B9  | 1.09408913    |
| B10 | 1.09193508    |
| B11 | 1.10177260    |
| B12 | 1.54208093    |
| B13 | 1.09311886    |
| B14 | 1.09178239    |
| B15 | 1.09370740    |
| B16 | 1.49090182    |
| B17 | 1.09227570    |
| B18 | 1.09431159    |
| B19 | 1.10162104    |
| A1  | 108.23912762  |
| A2  | 109.38565719  |
| A3  | 115.16305677  |
| A4  | 123.85896901  |
| A5  | 99.04499788   |
| A6  | 89.06691479   |
| A7  | 103.54936328  |
| A8  | 111.37923689  |
| A9  | 112.35712157  |
| A10 | 110.29283969  |
| A11 | 110.95445648  |
| A12 | 110.25335173  |
| A13 | 110.54058221  |
| A14 | 111.35666395  |
| A15 | 101.91012920  |
| A16 | 112.33128469  |
| A17 | 111.22022810  |
| A18 | 110.40384184  |
| D1  | -119.82877677 |
| D2  | 165.19146026  |
| D3  | -32.84450809  |
| D4  | 114.45923806  |

|     |              |
|-----|--------------|
| D5  | 50.53452014  |
| D6  | -67.18927889 |
| D7  | -62.29556349 |
| D8  | 59.72523582  |
| D9  | 179.21191735 |
| D10 | 88.09537572  |
| D11 | 178.15226676 |
| D12 | -61.89095584 |
| D13 | 58.34616105  |
| D14 | 168.13771039 |
| D15 | -61.52732212 |
| D16 | 60.19434528  |
| D17 | 178.80367918 |

TS S9

02

|   |    |     |    |     |    |     |
|---|----|-----|----|-----|----|-----|
| C |    |     |    |     |    |     |
| H | 1  | B1  |    |     |    |     |
| C | 1  | B2  | 2  | A1  |    |     |
| H | 3  | B3  | 1  | A2  | 2  | D1  |
| S | 3  | B4  | 1  | A3  | 2  | D2  |
| H | 5  | B5  | 3  | A4  | 1  | D3  |
| C | 1  | B6  | 3  | A5  | 5  | D4  |
| H | 7  | B7  | 1  | A6  | 3  | D5  |
| H | 7  | B8  | 1  | A7  | 3  | D6  |
| H | 7  | B9  | 1  | A8  | 3  | D7  |
| S | 3  | B10 | 1  | A9  | 7  | D8  |
| C | 11 | B11 | 3  | A10 | 1  | D9  |
| H | 12 | B12 | 11 | A11 | 3  | D10 |
| C | 12 | B13 | 11 | A12 | 3  | D11 |
| H | 14 | B14 | 12 | A13 | 11 | D12 |
| H | 14 | B15 | 12 | A14 | 11 | D13 |

|     |            |
|-----|------------|
| B1  | 1.08783393 |
| B2  | 1.40052145 |
| B3  | 1.08717340 |
| B4  | 1.80119224 |
| B5  | 1.34851420 |
| B6  | 1.49205251 |
| B7  | 1.09932336 |
| B8  | 1.09705966 |
| B9  | 1.09350559 |
| B10 | 2.25605884 |
| B11 | 1.75558950 |

|     |               |
|-----|---------------|
| B12 | 1.09015062    |
| B13 | 1.34336517    |
| B14 | 1.08562336    |
| B15 | 1.08680780    |
| A1  | 118.16253204  |
| A2  | 117.23375415  |
| A3  | 115.98103957  |
| A4  | 96.67195821   |
| A5  | 123.44235473  |
| A6  | 111.04544212  |
| A7  | 110.82042895  |
| A8  | 112.10152059  |
| A9  | 105.21667198  |
| A10 | 101.45762440  |
| A11 | 116.73027105  |
| A12 | 123.63580221  |
| A13 | 121.55716276  |
| A14 | 120.85033693  |
| D1  | -168.06535741 |
| D2  | -28.04367816  |
| D3  | 165.15793688  |
| D4  | 160.81714921  |
| D5  | 104.09826465  |
| D6  | -137.45101571 |
| D7  | -16.26474640  |
| D8  | -84.31996164  |
| D9  | 76.06788336   |
| D10 | 57.63793470   |
| D11 | -126.34997845 |
| D12 | 3.79654607    |
| D13 | -174.23052196 |

TS S10

02

|   |   |    |   |    |   |    |
|---|---|----|---|----|---|----|
| C |   |    |   |    |   |    |
| H | 1 | B1 |   |    |   |    |
| H | 1 | B2 | 2 | A1 |   |    |
| H | 1 | B3 | 2 | A2 | 3 | D1 |
| C | 1 | B4 | 2 | A3 | 3 | D2 |
| H | 5 | B5 | 1 | A4 | 2 | D3 |
| H | 5 | B6 | 1 | A5 | 2 | D4 |
| C | 5 | B7 | 1 | A6 | 2 | D5 |
| H | 8 | B8 | 5 | A7 | 1 | D6 |
| C | 8 | B9 | 5 | A8 | 1 | D7 |

|   |    |     |    |     |    |     |
|---|----|-----|----|-----|----|-----|
| H | 10 | B10 | 8  | A9  | 5  | D8  |
| C | 10 | B11 | 8  | A10 | 5  | D9  |
| H | 12 | B12 | 10 | A11 | 8  | D10 |
| C | 12 | B13 | 10 | A12 | 8  | D11 |
| H | 14 | B14 | 12 | A13 | 10 | D12 |
| S | 14 | B15 | 12 | A14 | 10 | D13 |

|     |               |
|-----|---------------|
| B1  | 1.09266972    |
| B2  | 1.09267818    |
| B3  | 1.09358359    |
| B4  | 1.53794033    |
| B5  | 1.09345525    |
| B6  | 1.09387469    |
| B7  | 1.50964421    |
| B8  | 1.95125477    |
| B9  | 1.38681361    |
| B10 | 1.08282944    |
| B11 | 1.41559576    |
| B12 | 1.08214068    |
| B13 | 1.36950861    |
| B14 | 1.07915927    |
| B15 | 1.72557593    |
| A1  | 107.79375512  |
| A2  | 108.20569344  |
| A3  | 110.99518282  |
| A4  | 109.78752725  |
| A5  | 109.68591126  |
| A6  | 113.40048793  |
| A7  | 93.24614921   |
| A8  | 127.20319729  |
| A9  | 122.12414099  |
| A10 | 113.86260816  |
| A11 | 123.96464382  |
| A12 | 112.79621087  |
| A13 | 128.34498057  |
| A14 | 111.62972487  |
| D1  | 116.62505613  |
| D2  | -122.06621199 |
| D3  | -177.89090759 |
| D4  | -61.66298405  |
| D5  | 58.85574903   |
| D6  | 179.12940657  |
| D7  | -80.65092338  |
| D8  | -16.61293339  |
| D9  | 165.76921181  |
| D10 | 176.70435061  |

D11 -2.80270074  
 D12 178.35996518  
 D13 -0.27616375

TS S11

02

|   |    |     |    |     |    |
|---|----|-----|----|-----|----|
| C |    |     |    |     |    |
| H | 1  | B1  |    |     |    |
| H | 1  | B2  | 2  | A1  |    |
| H | 1  | B3  | 2  | A2  | 3  |
| C | 1  | B4  | 2  | A3  | 4  |
| H | 5  | B5  | 1  | A4  | 2  |
| H | 5  | B6  | 1  | A5  | 2  |
| C | 5  | B7  | 1  | A6  | 2  |
| H | 8  | B8  | 5  | A7  | 1  |
| C | 8  | B9  | 5  | A8  | 1  |
| H | 10 | B10 | 8  | A9  | 5  |
| C | 10 | B11 | 8  | A10 | 5  |
| H | 12 | B12 | 10 | A11 | 8  |
| C | 12 | B13 | 10 | A12 | 8  |
| H | 14 | B14 | 12 | A13 | 10 |
| S | 14 | B15 | 12 | A14 | 10 |

B1 1.09351560  
 B2 1.09371019  
 B3 1.10026893  
 B4 1.49371657  
 B5 1.08652584  
 B6 1.08664506  
 B7 2.28896361  
 B8 1.07932556  
 B9 1.39776252  
 B10 1.08208642  
 B11 1.41172261  
 B12 1.08266153  
 B13 1.37315331  
 B14 1.07889800  
 B15 1.73372688  
 A1 108.09618367  
 A2 107.05092794  
 A3 111.55977221  
 A4 117.62863563  
 A5 117.68353457  
 A6 107.88828379

|     |               |
|-----|---------------|
| A7  | 86.11963546   |
| A8  | 106.27597828  |
| A9  | 122.63867694  |
| A10 | 113.20876335  |
| A11 | 123.79578250  |
| A12 | 113.26889758  |
| A13 | 128.42580469  |
| A14 | 111.52692059  |
| D1  | 114.91444359  |
| D2  | 122.23607554  |
| D3  | 169.06089153  |
| D4  | -48.03655855  |
| D5  | 60.42918947   |
| D6  | 179.94298269  |
| D7  | -54.12274069  |
| D8  | -71.40898847  |
| D9  | 106.17564513  |
| D10 | -175.60622045 |
| D11 | 4.76761295    |
| D12 | -178.34182613 |
| D13 | 0.29435173    |

TS S12

0 2

|   |    |     |    |     |   |     |
|---|----|-----|----|-----|---|-----|
| C |    |     |    |     |   |     |
| H | 1  | B1  |    |     |   |     |
| C | 1  | B2  | 2  | A1  |   |     |
| H | 3  | B3  | 1  | A2  | 2 | D1  |
| C | 3  | B4  | 1  | A3  | 2 | D2  |
| H | 5  | B5  | 3  | A4  | 1 | D3  |
| C | 5  | B6  | 3  | A5  | 1 | D4  |
| H | 7  | B7  | 5  | A6  | 3 | D5  |
| S | 7  | B8  | 5  | A7  | 3 | D6  |
| C | 1  | B9  | 3  | A8  | 5 | D7  |
| H | 10 | B10 | 1  | A9  | 3 | D8  |
| H | 10 | B11 | 1  | A10 | 3 | D9  |
| C | 10 | B12 | 1  | A11 | 3 | D10 |
| H | 13 | B13 | 10 | A12 | 1 | D11 |

|    |            |
|----|------------|
| B1 | 1.07865811 |
| B2 | 1.38937916 |
| B3 | 1.08152683 |
| B4 | 1.41464186 |
| B5 | 1.08231295 |

|     |               |
|-----|---------------|
| B6  | 1.37192642    |
| B7  | 1.07899279    |
| B8  | 1.73035974    |
| B9  | 3.19374227    |
| B10 | 1.09268314    |
| B11 | 1.08912179    |
| B12 | 1.31098518    |
| B13 | 1.08242146    |
| A1  | 126.87218069  |
| A2  | 122.71847006  |
| A3  | 112.93956088  |
| A4  | 123.87416652  |
| A5  | 113.03292598  |
| A6  | 128.36371588  |
| A7  | 111.64474882  |
| A8  | 111.18010049  |
| A9  | 161.86944579  |
| A10 | 82.70978552   |
| A11 | 39.67478999   |
| A12 | 132.88873577  |
| D1  | 19.87009537   |
| D2  | -162.82821615 |
| D3  | -176.27562940 |
| D4  | 3.88811982    |
| D5  | -178.89605868 |
| D6  | 0.25085611    |
| D7  | 124.16601971  |
| D8  | -66.65835113  |
| D9  | 110.42358729  |
| D10 | -71.09615489  |
| D11 | 177.86115145  |
